# Supplementary material for: Bioinformatics Analysis Reveals Most Prominent Gene Candidates to Distinguish Colorectal Adenoma from Adenocarcinoma
Source: Biomed Res Int. 2018 Aug 6;2018:9416515. doi: 10.1155/2018/9416515 (PMC6106857; doi:10.1155/2018/9416515)
Supplement: Supplementary 2 — Supplementary Table 1 shows a list of genes common in each comparison and their expressions for each project. [file 9416515.f2.xlsx]

## Sheet: Adenoma vs normal
Adenoma vs normal
			GSE10714					GSE37364					GSE41657					GSE50114, GSE50115
Gene symbol	Entrez gene	up/down regulated	Probe (Affymetrix Human Genome U133 Plus 2.0 array)	logFC	Average expression	p-value	adjusted p-value	Probe (Affymetrix HG U133 plus 2)	logFC	Average expression	p-value	adjusted p-value	Probe (Agilent Whole Human Genome Microarray 4x44K G4112F)	logFC	Average expression	p-value	adjusted p-value	Probe (Agilent Whole Human Genome Microarray 4x44K G4112F)	logFC	Average expression	p-value	adjusted p-value
ABCG2	9429	↓	209735_at	-5.13022	6.68433	3.96331e-07	0.000276522	209735_at	-4.4815	8.26726	7.31918e-26	4.22177e-23	A_23_P18713	-3.04166	9.52177	1.01005e-19	8.5787e-18	A_23_P18713	-3.54929	9.12604	7.89547e-19	3.72254e-16
ADAMDEC1	27299	↓	206134_at	-3.79089	10.3611	3.97416e-07	0.000276522	206134_at	-3.2263	11.1527	1.0879e-20	1.49388e-18	A_23_P256425	-5.77715	8.61885	3.45923e-35	4.41837e-32	A_23_P256425	-3.61077	11.3301	2.13102e-18	8.97428e-16
ADH1B	125	↓	209613_s_at	-2.80834	5.1053	0.00143872	0.021762	209613_s_at	-2.97547	7.09286	1.53591e-13	3.28121e-12	A_24_P291658	-1.97592	7.92599	1.94642e-19	1.58428e-17	A_24_P291658	-2.92005	9.40758	1.56939e-11	1.18184e-09
AHCYL2	23382	↓	212814_at	-2.1874	9.56393	6.27575e-05	0.00421824	215672_s_at	-1.595	8.78042	5.17096e-13	9.68795e-12	A_24_P72518	-2.04876	11.4568	1.04758e-10	1.99136e-09	A_24_P72518	-1.97743	12.4193	4.93218e-11	3.21712e-09
ANPEP	290	↓	202888_s_at	-4.08105	7.19047	0.000432244	0.0116611	202888_s_at	-3.8176	9.89487	2.75975e-15	9.32879e-14	A_23_P88626	-2.54225	7.92123	6.78474e-05	0.000264051	A_23_P88626	-4.02973	9.67469	4.5401e-10	2.23025e-08
APOE	348	↓	203382_s_at	-1.76341	7.57741	0.00291084	0.0318301	203382_s_at	-1.65644	8.4176	1.41857e-14	3.91623e-13	A_23_P164650	-3.968	9.54861	2.56405e-23	4.15364e-21	A_23_P164650	-2.32854	12.8502	8.53829e-08	1.85773e-06
AQP1	358	↓	209047_at	-1.93527	7.57314	0.00242207	0.0288219	209047_at	-1.65113	8.41049	1.32634e-14	3.6955e-13	A_23_P19894	-1.66277	9.55361	2.58609e-09	3.46856e-08	A_23_P19894	-1.68282	10.4524	1.01556e-05	0.000102851
AQP8	343	↓	206784_at	-6.63782	7.76084	4.80493e-05	0.00352396	206784_at	-5.14287	9.45663	3.77176e-19	3.51383e-17	A_23_P26522	-4.23717	9.26731	3.31685e-12	8.4535e-11	A_23_P26522	-4.36852	9.47654	2.21381e-12	2.10123e-10
ASCL2	430	↑	229215_at	2.53808	9.76368	5.08611e-06	0.00108876	229215_at	2.45481	9.19389	4.72967e-15	1.48233e-13	A_32_P171061	2.50795	12.9449	6.38898e-10	9.96111e-09	A_32_P171061	3.36458	13.8179	2.1275e-10	1.15787e-08
AXIN2	8313	↑	222696_at	3.07511	9.66521	4.09083e-06	0.00103288	222696_at	2.67707	10.041	2.7503e-22	6.06184e-20	A_23_P148015	2.54844	12.0517	2.28646e-14	8.69771e-13	A_23_P148015	3.16144	12.7288	2.36815e-14	3.64259e-12
AZGP1	563	↑	209309_at	3.00264	7.63354	0.00127846	0.0207293	209309_at	1.87077	7.76673	8.01072e-10	7.31214e-09	A_23_P71268	2.38562	10.2017	9.39928e-09	1.09716e-07	A_23_P71268	1.59905	10.8521	3.92762e-05	0.000320354
B3GNT7	93010	↓	1555963_x_at	-2.8283	6.15764	1.98012e-05	0.00218215	1555963_x_at	-1.80682	8.16333	9.49821e-09	6.91266e-08	A_24_P20292	-4.07051	9.04687	2.29918e-22	3.06641e-20	A_24_P20292	-2.46388	10.2383	5.71118e-06	6.39179e-05
BACE2	25825	↑	227051_at	3.33814	6.74137	0.000194133	0.007762	227051_at	2.68499	7.04199	2.43434e-24	9.0404e-22	A_24_P889070	2.11633	8.25957	4.37631e-11	8.91613e-10	A_23_P154875	2.2079	14.1573	1.97038e-17	6.62537e-15
BEST2	54831	↓	207432_at	-2.16034	7.98058	0.000662567	0.0147436	207432_at	-1.99234	8.54355	4.38766e-11	5.37018e-10	A_23_P16225	-2.19725	9.14215	6.46218e-15	2.67918e-13	A_23_P16225	-1.70731	10.5122	0.000775484	0.00387662
C2orf88	84281	↓	228195_at	-3.24314	7.75957	0.000147204	0.0068535	228195_at	-2.49855	8.50693	1.73961e-19	1.75319e-17	A_23_P17130	-3.20471	7.99793	2.55184e-17	1.51599e-15	A_23_P17130	-2.22669	8.81271	3.4685e-15	6.24273e-13
CA1	759	↓	205950_s_at	-7.24074	8.66871	3.65531e-06	0.000999829	205950_s_at	-5.15729	10.2399	1.42716e-19	1.4723e-17	A_23_P168916	-7.24338	10.0968	1.11797e-20	1.09843e-18	A_23_P168916	-7.11111	10.3143	2.25104e-14	3.48718e-12
CA2	760	↓	209301_at	-4.73975	10.0064	0.00108344	0.0189161	209301_at	-2.81519	11.5697	1.97241e-09	1.64732e-08	A_23_P8913	-3.23215	11.9677	1.35665e-18	9.79411e-17	A_23_P8913	-4.57982	11.8404	5.4096e-13	6.01658e-11
CA4	762	↓	206209_s_at	-7.06419	7.57829	3.47738e-05	0.00299316	206209_s_at	-4.82506	9.30099	4.73513e-18	3.27473e-16	A_23_P4096	-5.00505	9.56059	1.22799e-12	3.41544e-11	A_23_P4096	-5.22304	9.88446	6.97683e-14	9.39836e-12
CA7	766	↓	207504_at	-3.27842	7.11682	1.44887e-07	0.000196837	207504_at	-2.20946	7.86632	5.62335e-24	1.83674e-21	A_23_P106656	-2.29497	8.46359	4.72724e-33	4.36075e-30	A_23_P106656	-2.64434	8.12217	3.1157e-26	1.68933e-22
CADPS	8618	↑	1568604_a_at	3.6196	7.54988	9.02273e-05	0.00530429	1568604_a_at	2.49393	7.28419	1.71973e-13	3.61691e-12	A_23_P69326	1.66837	8.69246	7.18677e-08	6.64251e-07	A_23_P69326	1.78262	9.41211	3.39989e-09	1.22486e-07
CCL13	6357	↓	206407_s_at	-1.81588	6.78953	0.00487444	0.042104	206407_s_at	-1.88531	7.92928	9.28926e-12	1.31711e-10	A_23_P26965	-2.95806	6.74069	1.21734e-19	1.01831e-17	A_23_P26965	-3.75849	9.96802	5.98483e-13	6.53899e-11
CD163L1	283316	↓	223655_at	-2.12767	7.60271	0.000781586	0.0161893	223655_at	-1.57618	8.59747	1.28116e-17	7.9347e-16	A_23_P61466	-3.17726	7.62976	3.74741e-30	2.30459e-27	A_23_P61466	-1.97697	9.61484	3.02189e-13	3.58135e-11
CD177	57126	↓	219669_at	-4.37078	7.62253	0.00311393	0.0327595	219669_at	-4.19331	9.17019	4.18938e-18	2.93473e-16	A_32_P143589	-5.34967	7.74279	6.8394e-20	5.94581e-18	A_23_P259863	-4.82449	9.72334	9.96135e-12	7.81345e-10
CD36	948	↓	206488_s_at	-2.25124	5.78906	1.7568e-06	0.000720799	228766_at	-2.36015	6.47858	5.20945e-16	2.07995e-14	A_23_P111583	-3.53086	6.83407	1.54024e-33	1.5044e-30	A_23_P111583	-1.95596	9.08397	1.55095e-14	2.47331e-12
CDHR5	53841	↓	220075_s_at	-2.88072	7.81043	9.93529e-05	0.00555868	220075_s_at	-2.32987	9.31055	1.72834e-11	2.29571e-10	A_24_P352388	-1.59961	6.49979	1.49263e-10	2.73559e-09	A_23_P202683	-1.79118	12.1168	3.93008e-09	1.39295e-07
CDKN2B	1030	↓	236313_at	-5.17457	7.71548	3.93067e-07	0.000276522	236313_at	-3.84451	8.93687	3.54191e-23	1.00022e-20	A_24_P360674	-3.64699	7.74536	1.03375e-16	5.61861e-15	A_24_P360674	-2.53029	8.53853	2.7465e-17	8.69579e-15
CEACAM1	634	↓	206576_s_at	-2.68883	9.34839	0.00172068	0.0241018	206576_s_at	-1.99299	10.7398	5.46334e-13	1.01795e-11	A_24_P382319	-1.58946	13.5922	1.67666e-07	1.40253e-06	A_24_P382319	-2.60622	13.8488	4.45765e-10	2.1966e-08
CEACAM7	1087	↓	206198_s_at	-6.14688	8.54533	0.000375552	0.0109968	206198_s_at	-3.57631	10.6578	1.07694e-08	7.74833e-08	A_23_P130573	-3.19586	11.5437	1.68505e-06	1.04303e-05	A_23_P130573	-4.27593	11.7986	1.07525e-10	6.34373e-09
CEMIP	57214	↑	212942_s_at	4.96091	8.44154	3.74683e-07	0.000276522	212942_s_at	5.17836	8.58088	1.34324e-41	3.64152e-37	A_23_P324754	4.19871	9.56543	1.14082e-24	2.47618e-22	A_32_P161855	4.6846	12.2505	2.5995e-17	8.29087e-15
CES2	8824	↓	209668_x_at	-2.16799	9.91895	0.00305598	0.032585	209668_x_at	-1.82475	11.0671	5.5346e-16	2.19682e-14	A_23_P49192	-2.07177	10.3679	1.9906e-10	3.53319e-09	A_23_P49192	-2.4454	11.3528	5.72088e-09	1.89716e-07
CFH	3075	↓	213800_at	-1.855	5.92073	5.89304e-05	0.00404051	213800_at	-1.68521	7.28762	4.96462e-18	3.40694e-16	A_23_P200160	-4.56059	7.07539	3.94036e-36	6.23121e-33	A_23_P114740	-2.75865	10.7063	2.22043e-15	4.26165e-13
CFHR1	3078	↓	215388_s_at	-1.63185	7.13423	0.000790623	0.0162193	215388_s_at	-1.54182	8.20079	2.9653e-16	1.26002e-14	A_23_P114740	-3.35471	8.07425	6.04634e-28	2.41919e-25	A_23_P114740	-2.75865	10.7063	2.22043e-15	4.26165e-13
CHGA	1113	↓	204697_s_at	-4.18989	7.45195	2.25746e-07	0.000261012	204697_s_at	-2.7948	9.95714	1.6367e-29	4.43709e-26	A_32_P27046	-3.19992	9.29675	2.54531e-34	2.81757e-31	A_32_P27046	-4.22454	9.65218	3.1572e-20	2.04398e-17
CHP2	63928	↓	206149_at	-3.23752	8.29759	0.000175287	0.00739096	206149_at	-2.92409	9.20343	4.61294e-19	4.1825e-17	A_23_P349463	-3.49029	12.8409	2.3817e-09	3.2139e-08	A_23_P349463	-3.41661	13.9192	5.46592e-07	8.9603e-06
CLCA4	22802	↓	220026_at	-7.10074	7.86301	0.000445055	0.0119413	220026_at	-5.09947	10.0234	1.61174e-13	3.41361e-12	A_23_P45751	-4.82446	9.04168	2.76267e-14	1.03433e-12	A_23_P45751	-4.10301	9.06227	2.73058e-11	1.92588e-09
CLCN2	1181	↓	213499_at	-1.59056	6.8928	3.0575e-07	0.000270776	213499_at	-1.51184	7.91685	7.06029e-21	1.05167e-18	A_23_P132845	-1.86336	8.69833	1.02465e-11	2.36467e-10	A_23_P132845	-1.7248	9.78039	5.25835e-10	2.53429e-08
CLDN1	9076	↑	222549_at	3.05326	7.59435	1.30462e-05	0.00182221	222549_at	2.74197	8.0129	4.3489e-26	2.94747e-23	A_23_P57784	2.89428	8.876	1.39278e-15	6.40621e-14	A_23_P57784	1.92034	9.30007	5.02303e-09	1.69688e-07
CLDN23	137075	↓	228707_at	-3.56415	7.96603	6.06952e-07	0.000362221	228706_s_at	-2.98373	8.03104	3.92744e-24	1.38277e-21	A_23_P134854	-3.34504	9.91452	1.49188e-17	9.12409e-16	A_23_P134854	-2.6406	10.8232	6.93948e-18	2.52947e-15
CLDN8	9073	↓	214598_at	-6.66093	6.08433	2.38561e-07	0.000261012	214598_at	-4.19448	7.90542	1.05293e-15	3.9049e-14	A_23_P427014	-5.41156	7.2902	3.77774e-28	1.54883e-25	A_23_P427014	-1.87236	7.96839	1.11515e-05	0.000111376
CLIC5	53405	↓	213317_at	-2.25315	9.17992	1.86256e-05	0.00214591	213317_at	-1.93411	10.0788	4.77248e-15	1.49402e-13	A_23_P311895	-1.92007	9.00481	3.12996e-14	1.15236e-12	A_23_P416774	-2.35398	11.5115	3.59424e-13	4.16855e-11
CPM	1368	↓	235019_at	-2.3933	7.45202	0.000241471	0.00874179	235019_at	-1.96072	8.22444	1.55649e-14	4.25797e-13	A_24_P938352	-2.824	7.07544	5.89611e-17	3.34707e-15	A_23_P162668	-2.07701	9.16445	2.98875e-15	5.51659e-13
CRNDE	101927480	↑	238021_s_at	4.39233	6.79987	2.49229e-08	0.00016095	238021_s_at	3.91603	6.2847	1.63578e-25	8.36716e-23	A_32_P104063	2.4628	8.94577	3.5651e-10	5.94643e-09	A_32_P104063	2.58372	9.71798	9.58331e-08	2.0457e-06
CXCL12	6387	↓	209687_at	-3.25746	7.1139	0.000982136	0.0181882	209687_at	-2.68926	8.36055	1.36381e-21	2.51516e-19	A_23_P202448	-3.78765	7.11594	2.74848e-37	6.08495e-34	A_23_P202448	-3.65429	10.1159	7.19744e-20	4.27666e-17
CYP4X1	260293	↑	227702_at	3.46122	6.23759	0.000253509	0.00893132	227702_at	2.71121	5.91672	3.45729e-11	4.31724e-10	A_24_P293530	2.28542	7.49115	4.091e-07	3.07093e-06	A_23_P72411	2.24832	9.97075	8.88918e-07	1.34959e-05
DHRS11	79154	↓	218756_s_at	-3.24932	8.7388	0.000181105	0.00747734	218756_s_at	-2.30883	10.0022	1.32415e-22	3.17678e-20	A_23_P27005	-1.86652	9.66406	3.5722e-18	2.45102e-16	A_23_P27005	-2.20734	10.3721	2.46986e-14	3.77227e-12
DHRS9	10170	↓	224009_x_at	-4.4633	8.38092	0.00167307	0.0236879	224009_x_at	-2.60785	9.94886	1.61625e-08	1.12063e-07	A_23_P56559	-2.55495	10.0493	9.73251e-06	4.87573e-05	A_23_P56559	-3.25832	10.5993	1.23777e-09	5.2585e-08
DUSP27	92235	↑	232252_at	6.05373	7.17003	8.09336e-08	0.000177101	232252_at	4.13417	6.77922	4.16248e-10	4.05188e-09	A_23_P423012	2.43166	7.61673	0.00993583	0.0202739	A_23_P423012	2.92218	9.57274	0.00168341	0.00734753
EDN3	1908	↓	208399_s_at	-3.64342	6.36412	1.0385e-06	0.000524416	208399_s_at	-2.94433	7.78203	5.87149e-18	3.93027e-16	A_23_P17438	-3.45382	7.04856	6.46604e-16	3.13934e-14	A_23_P17438	-2.40703	8.3812	1.64832e-14	2.5999e-12
EMP1	2012	↓	201325_s_at	-2.03705	9.13014	0.00536845	0.0441804	201325_s_at	-2.07386	10.1138	2.13409e-13	4.38629e-12	A_23_P76488	-1.68153	12.7575	2.64103e-06	1.5493e-05	A_23_P76488	-1.84413	12.9886	2.98763e-09	1.1029e-07
F13A1	2162	↓	203305_at	-2.99028	6.84496	2.70203e-06	0.000901927	203305_at	-2.23947	8.048	4.43443e-17	2.33886e-15	A_32_P140139	-2.82344	7.85971	1.87282e-31	1.32329e-28	A_32_P140139	-3.28617	9.5588	1.99942e-17	6.6713e-15
FABP6	2172	↑	210445_at	3.7077	6.81676	3.68998e-05	0.00307926	210445_at	2.09196	7.03915	2.7471e-08	1.81246e-07	A_23_P43846	3.30808	8.89419	2.81866e-09	3.75321e-08	A_23_P43846	2.85584	10.0446	6.27195e-07	1.00611e-05
FBLN1	2192	↓	202995_s_at	-1.89456	6.81438	0.00243578	0.0289326	202995_s_at	-2.13199	8.25115	2.83361e-13	5.66362e-12	A_23_P211631	-3.63719	9.71782	3.1724e-19	2.50838e-17	A_23_P211631	-3.62898	12.6421	5.24287e-15	9.16996e-13
FGL2	10875	↓	204834_at	-2.13891	8.27481	0.000394684	0.0112814	204834_at	-1.61335	9.07433	3.66971e-15	1.19431e-13	A_23_P42969	-3.16684	8.66993	5.22112e-25	1.23849e-22	A_23_P42969	-1.83124	10.6181	3.60807e-13	4.17344e-11
FN1	2335	↓	211719_x_at	-2.22189	9.66301	0.00322891	0.0335038	211719_x_at	-1.75122	10.6244	1.32317e-08	9.33412e-08	A_24_P119745	-3.69099	8.19758	1.4397e-07	1.22907e-06	A_24_P119745	-2.22439	10.1787	1.64042e-05	0.000153153
FOXQ1	94234	↑	227475_at	5.388	9.88215	5.31551e-06	0.00111366	227475_at	4.49517	9.34696	1.14143e-32	6.18883e-29	A_32_P164246	3.5504	10.2422	3.9631e-15	1.69165e-13	A_32_P164246	3.49797	10.9765	5.70583e-13	6.28163e-11
GALNT6	11226	↑	228303_at	2.41434	8.13812	6.75682e-05	0.00434865	219956_at	2.25351	8.9167	4.24807e-22	8.72464e-20	A_23_P204133	1.84983	9.49459	7.24573e-13	2.09238e-11	A_23_P204133	1.86435	10.0463	4.02592e-08	9.89396e-07
GCG	2641	↓	206422_at	-7.33755	6.47974	8.11572e-06	0.00142706	206422_at	-5.61332	7.34788	3.1733e-25	1.48324e-22	A_23_P254664	-7.07066	7.5636	8.53396e-51	2.83404e-46	A_23_P254664	-3.81313	8.64621	1.61118e-12	1.59195e-10
GDF15	9518	↑	221577_x_at	2.30428	9.31345	5.64966e-05	0.00395504	221577_x_at	3.14855	9.36793	2.94443e-23	8.49185e-21	A_23_P16523	2.66206	14.9785	1.61639e-17	9.83125e-16	A_23_P16523	2.05939	15.6099	1.1053e-07	2.29614e-06
GDPD3	79153	↓	219722_s_at	-2.02634	7.70996	0.00107135	0.0188805	219722_s_at	-1.58463	8.64257	4.61636e-15	1.45354e-13	A_23_P26511	-2.03153	8.38114	7.22674e-08	6.67203e-07	A_23_P26511	-2.4536	9.67856	1.15101e-09	4.93341e-08
GLIPR2	152007	↓	225604_s_at	-2.83923	6.62792	9.5248e-05	0.00546885	225604_s_at	-1.61338	7.87255	6.14937e-16	2.40215e-14	A_23_P414913	-2.4913	10.38	2.80051e-13	8.67557e-12	A_23_P414913	-1.5181	12.4917	1.1559e-07	2.3864e-06
GPAT3	84803	↓	224480_s_at	-1.87396	6.93506	0.000584373	0.0138159	224480_s_at	-2.082	8.25148	2.8082e-18	2.05758e-16	A_23_P69810	-1.61678	9.04211	1.45313e-12	3.99147e-11	A_23_P69810	-1.90344	9.93046	1.25892e-12	1.29095e-10
GPNMB	10457	↓	201141_at	-2.3522	9.12551	4.39013e-05	0.00333412	201141_at	-1.93743	10.1941	2.21564e-13	4.547e-12	A_23_P134426	-4.62154	8.14965	4.97827e-26	1.53077e-23	A_23_P134426	-2.0221	11.1598	1.89481e-09	7.58904e-08
GTF2IRD1	9569	↑	218412_s_at	1.81558	8.85313	3.16231e-07	0.000270776	218412_s_at	1.54404	9.215	2.32981e-29	5.74192e-26	A_23_P111621	1.86619	10.8908	2.60434e-20	2.42262e-18	A_23_P111621	1.54792	12.1299	5.97543e-11	3.81723e-09
GUCA2A	2980	↓	207003_at	-6.14537	9.52792	6.9234e-06	0.00129857	207003_at	-4.52244	10.5811	2.22891e-28	3.18031e-25	A_23_P11968	-5.43417	9.06387	3.39147e-29	1.70647e-26	A_23_P11968	-4.97865	9.36857	2.98968e-19	1.52565e-16
GUCA2B	2981	↓	207502_at	-4.96203	6.67247	2.31578e-05	0.00238706	207502_at	-4.26668	8.40193	8.7846e-31	2.97688e-27	A_23_P63032	-5.95816	8.20927	5.50418e-33	4.94023e-30	A_23_P63032	-5.13327	8.80262	4.09365e-21	3.86013e-18
HAPLN1	1404	↓	230204_at	-2.60434	5.87688	3.84643e-06	0.00102488	205523_at	-2.14781	6.17285	1.16646e-19	1.26491e-17	A_23_P7727	-3.04922	7.41068	8.42755e-37	1.6463e-33	A_23_P7727	-2.28534	8.93216	1.3852e-12	1.39407e-10
HIGD1A	25994	↓	242317_at	-2.9082	7.52735	4.52524e-06	0.00103628	242317_at	-1.79426	9.08354	1.14953e-21	2.13451e-19	A_24_P548866	-2.31574	7.80152	3.2738e-18	2.25559e-16	A_24_P548866	-1.52262	8.63927	2.15672e-11	1.55141e-09
HPGD	3248	↓	203913_s_at	-3.82525	7.97291	1.5065e-07	0.000196837	211548_s_at	-2.75665	10.295	3.4508e-15	1.13121e-13	A_24_P71904	-2.85553	7.29622	1.44021e-10	2.64535e-09	A_23_P213050	-1.87155	9.95748	6.1794e-10	2.91662e-08
HRASLS2	54979	↓	221122_at	-1.70307	6.39241	0.000944385	0.0180224	221122_at	-1.89891	7.52417	3.70114e-12	5.74345e-11	A_24_P364263	-3.37511	7.52802	6.01155e-15	2.52068e-13	A_23_P105012	-3.68955	8.71843	3.12801e-16	7.62249e-14
HRCT1	646962	↓	235496_at	-3.36894	8.32508	3.53935e-05	0.00303061	235496_at	-1.87051	8.97208	1.19624e-14	3.36169e-13	A_23_P94434	-2.72377	8.079	2.12108e-15	9.42956e-14	A_23_P94434	-2.16209	9.29167	3.00869e-10	1.55178e-08
HSD17B2	3294	↓	204818_at	-3.73839	8.80376	0.000407366	0.0114609	204818_at	-2.39834	10.2442	6.30546e-12	9.27013e-11	A_23_P118065	-2.38925	11.0615	2.7222e-05	0.000119531	A_23_P118065	-2.60388	11.6982	1.13354e-08	3.38391e-07
IGF1	3479	↓	209541_at	-2.83795	6.73845	3.3981e-05	0.00298759	209541_at	-1.62159	7.41825	8.72252e-12	1.24326e-10	A_23_P13907	-2.12135	6.64685	6.92157e-33	5.74646e-30	A_23_P13907	-1.69319	8.52923	1.56866e-18	6.73684e-16
IL6R	3570	↓	226333_at	-2.21674	7.09683	0.000266424	0.00921388	205945_at	-2.2036	7.60129	5.20578e-21	7.97338e-19	A_24_P379413	-2.34197	8.16303	1.00204e-13	3.3818e-12	A_24_P379413	-2.15066	9.27819	3.43017e-15	6.19946e-13
ITIH5	80760	↓	219064_at	-1.51816	6.54826	0.00242535	0.0288435	219064_at	-1.57547	7.96953	5.17282e-16	2.06837e-14	A_23_P104252	-3.1218	6.94135	1.86856e-22	2.53278e-20	A_23_P104252	-2.3725	9.39262	3.67649e-14	5.28051e-12
KLK11	11012	↑	205470_s_at	2.92554	7.89055	0.000243962	0.00879315	205470_s_at	2.08904	7.73725	1.1723e-12	2.02556e-11	A_23_P101505	2.57686	8.73867	5.57361e-07	3.99168e-06	A_23_P101505	3.3922	10.4115	1.78768e-10	9.94135e-09
KRT20	54474	↓	213953_at	-1.6068	12.2586	0.00445892	0.040116	213953_at	-1.5477	12.8389	5.88065e-07	2.92093e-06	A_23_P66854	-1.80505	13.6013	1.45375e-07	1.23916e-06	A_23_P66854	-2.4587	13.0525	3.04228e-08	7.77618e-07
LGALS2	3957	↓	208450_at	-3.2636	8.02141	2.55581e-05	0.00251671	208450_at	-1.90347	8.6841	4.51637e-10	4.35261e-09	A_23_P120902	-3.51443	12.0274	1.44677e-08	1.60046e-07	A_23_P120902	-1.88674	13.6499	0.00288989	0.0114917
MALL	7851	↓	209373_at	-3.50667	10.0818	1.87416e-05	0.00214591	209373_at	-2.32837	11.2596	5.98194e-17	3.04831e-15	A_24_P80204	-2.21188	12.1927	1.37366e-10	2.53776e-09	A_24_P80204	-2.26742	13.1843	1.54931e-09	6.41127e-08
MEP1A	4224	↓	206000_at	-2.30991	9.44919	0.000592434	0.0139238	206000_at	-1.97425	10.5476	2.27885e-08	1.53299e-07	A_23_P93122	-2.84622	11.0437	4.57345e-09	5.79251e-08	A_24_P154868	-2.29668	11.4954	4.04994e-07	6.94074e-06
MET	4233	↑	203510_at	1.80826	10.1193	2.07502e-05	0.00224535	203510_at	1.54417	10.7914	1.8846e-28	2.83842e-25	A_23_P359245	2.32519	12.6413	1.05144e-21	1.22949e-19	A_23_P359245	1.57173	12.9462	1.80185e-10	9.99448e-09
MFAP4	4239	↓	212713_at	-2.31136	6.98448	4.40171e-05	0.00333412	212713_at	-1.53491	8.05732	1.97933e-16	8.85474e-15	A_23_P164057	-4.94621	8.06531	5.06993e-22	6.28236e-20	A_23_P164057	-3.34	12.1725	1.44428e-13	1.83716e-11
MIR3189	100422943	↑	221577_x_at	2.30428	9.31345	5.64966e-05	0.00395504	221577_x_at	3.14855	9.36793	2.94443e-23	8.49185e-21	A_23_P16523	2.66206	14.9785	1.61639e-17	9.83125e-16	A_23_P16523	2.05939	15.6099	1.1053e-07	2.29614e-06
MIR4436B1	100616123	↓	209373_at	-3.50667	10.0818	1.87416e-05	0.00214591	209373_at	-2.32837	11.2596	5.98194e-17	3.04831e-15	A_24_P80204	-2.21188	12.1927	1.37366e-10	2.53776e-09	A_24_P80204	-2.26742	13.1843	1.54931e-09	6.41127e-08
MIR4436B2	100847033	↓	209373_at	-3.50667	10.0818	1.87416e-05	0.00214591	209373_at	-2.32837	11.2596	5.98194e-17	3.04831e-15	A_24_P80204	-2.21188	12.1927	1.37366e-10	2.53776e-09	A_24_P80204	-2.26742	13.1843	1.54931e-09	6.41127e-08
MMP7	4316	↑	204259_at	3.90197	8.78573	0.000666508	0.0147818	204259_at	3.85335	8.17913	9.32347e-23	2.34036e-20	A_23_P52761	6.59325	11.2336	1.09212e-21	1.27257e-19	A_23_P52761	5.32157	11.7034	4.9825e-14	6.86098e-12
MS4A12	54860	↓	220834_at	-8.10527	8.21097	8.90483e-06	0.00150359	220834_at	-4.97172	9.36207	1.77183e-13	3.70749e-12	A_23_P127760	-4.41856	8.01791	4.93814e-20	4.40835e-18	A_23_P127760	-3.30752	8.55843	6.22261e-12	5.20877e-10
MT1M	4499	↓	217546_at	-4.20126	8.03732	0.00106308	0.0188223	217546_at	-2.66016	8.44445	7.92081e-10	7.23495e-09	A_24_P74828	-2.92241	9.26691	1.06507e-19	8.99997e-18	A_24_P74828	-2.55066	9.35536	2.68921e-06	3.38598e-05
MXD1	4084	↓	228846_at	-1.93181	8.28383	0.000560795	0.013485	228846_at	-1.87869	9.92607	5.90253e-16	2.31481e-14	A_24_P379750	-1.65658	11.1565	4.9424e-09	6.19834e-08	A_24_P379750	-1.59356	11.9082	8.04783e-10	3.66299e-08
MYC	4609	↑	202431_s_at	1.82023	10.4159	0.00161223	0.0233122	202431_s_at	1.77399	10.7901	2.62977e-28	3.56466e-25	A_23_P215956	2.1285	12.1537	1.01782e-16	5.55021e-15	A_23_P215956	1.57792	13.3023	8.14642e-08	1.78228e-06
NDN	4692	↓	209550_at	-2.10897	7.13708	6.16426e-06	0.00120197	209550_at	-1.74178	7.98004	1.47128e-20	1.98439e-18	A_23_P106405	-3.16521	7.20434	8.20207e-33	6.64347e-30	A_23_P106405	-1.5288	9.01561	1.15148e-07	2.3784e-06
NFE2L3	9603	↑	204702_s_at	2.2603	7.34831	1.39816e-08	0.00016095	236471_at	1.94426	7.28451	9.87811e-28	1.02998e-24	A_23_P42718	2.48071	11.5281	9.06609e-22	1.07912e-19	A_23_P42718	1.88746	12.3021	9.42225e-12	7.44444e-10
NKD1	85407	↑	229613_at	2.09273	6.54564	0.000189066	0.00763819	229613_at	2.17608	6.30477	2.16229e-11	2.82641e-10	A_32_P77742	2.60399	9.09044	5.88906e-06	3.13263e-05	A_32_P77742	1.80918	9.96552	0.000284797	0.00168646
NMU	10874	↑	206023_at	2.64909	7.32639	0.00357573	0.0353339	206023_at	1.87531	7.20839	3.04559e-09	2.45221e-08	A_23_P69537	1.52459	9.95616	0.000259057	0.000856279	A_23_P69537	1.81823	10.4754	0.000166545	0.00107421
NR3C1	2908	↓	216321_s_at	-2.8426	7.49456	2.95684e-06	0.000909874	216321_s_at	-1.93786	8.26023	1.92784e-19	1.9357e-17	A_23_P214059	-3.1777	7.25883	9.76381e-25	2.15781e-22	A_23_P214059	-1.73773	9.37329	3.71154e-11	2.50766e-09
PAG1	55824	↓	225622_at	-2.52292	7.46654	2.17416e-06	0.000790902	225622_at	-2.18476	8.69086	2.2219e-21	3.75413e-19	A_23_P347070	-2.1628	11.0971	5.75843e-13	1.68486e-11	A_23_P347070	-1.80418	12.0925	1.24037e-11	9.57333e-10
PCK1	5105	↓	208383_s_at	-4.78811	8.30336	4.47574e-06	0.00103628	208383_s_at	-3.25803	10.0029	6.45199e-14	1.51309e-12	A_23_P408249	-3.16997	9.10816	1.29965e-11	2.93806e-10	A_23_P408249	-3.14873	9.87341	2.53573e-09	9.63976e-08
PDZK1IP1	10158	↑	219630_at	1.56404	10.1848	0.00299335	0.032302	219630_at	1.57282	10.0926	5.94487e-13	1.09711e-11	A_23_P394304	1.87751	11.742	5.33099e-08	5.09312e-07	A_23_P394304	1.93356	12.7521	2.02496e-08	5.55213e-07
PHLDA1	22822	↑	217997_at	2.95436	7.39754	2.60083e-06	0.000883117	217996_at	2.42522	8.98933	1.4719e-24	5.86812e-22	A_23_P76450	2.20095	9.72521	1.40336e-09	2.0019e-08	A_23_P76450	1.78506	10.6541	9.89822e-08	2.09846e-06
PHLPP2	23035	↓	213407_at	-2.2485	8.09709	0.000108644	0.00591059	213407_at	-2.2651	9.35422	5.1386e-29	9.28715e-26	A_23_P418234	-2.39561	8.29936	6.69376e-18	4.36725e-16	A_23_P418234	-2.07008	9.22851	3.03593e-18	1.23071e-15
PKIB	5570	↓	223551_at	-4.25635	8.47216	0.000693275	0.0151723	231120_x_at	-3.47366	6.97717	2.79233e-19	2.72302e-17	A_23_P145529	-4.04726	8.79099	3.70673e-12	9.33258e-11	A_23_P145529	-2.66263	9.81873	1.73246e-10	9.68394e-09
PTN	5764	↓	211737_x_at	-2.88605	6.72251	3.92271e-06	0.00102488	211737_x_at	-1.92981	7.35133	1.17726e-17	7.45689e-16	A_23_P303087	-4.34265	6.74588	9.72967e-31	6.59413e-28	A_23_P303087	-2.70181	9.12795	7.47227e-16	1.63696e-13
PYY	5697	↓	207080_s_at	-6.33782	6.16595	1.22526e-07	0.000196837	207080_s_at	-5.34213	7.39174	2.35026e-26	1.72204e-23	A_23_P4112	-3.30928	8.69332	7.63061e-49	1.26702e-44	A_23_P4112	-3.3795	8.88037	1.67315e-16	4.17096e-14
QPCT	25797	↑	205174_s_at	2.03948	8.47241	0.00167195	0.0236879	205174_s_at	2.12855	8.38298	2.23981e-18	1.6636e-16	A_24_P71468	1.85205	10.5088	1.85054e-06	1.13364e-05	A_23_P16915	2.48938	10.9421	1.14118e-08	3.4044e-07
RNF43	54894	↑	218704_at	2.0687	9.59114	6.67418e-06	0.00127613	218704_at	1.72946	9.84282	1.50216e-18	1.17359e-16	A_23_P3934	2.51856	12.6858	1.44851e-19	1.20259e-17	A_23_P3934	1.85148	13.5877	4.89523e-09	1.66668e-07
S100A2	6273	↑	204268_at	3.01381	7.04854	0.000795588	0.0162703	204268_at	1.53849	7.27458	7.61034e-14	1.75141e-12	A_23_P201706	2.50788	10.8408	5.82775e-12	1.40752e-10	A_23_P201706	2.79102	10.8759	2.79303e-10	1.45614e-08
SBSPON	157869	↑	235210_s_at	4.04981	6.49603	0.00223021	0.0276934	235210_s_at	3.19071	6.4269	3.20479e-13	6.30492e-12	A_23_P170649	2.73685	9.08355	6.10081e-07	4.3254e-06	A_23_P170649	3.00262	10.3848	7.15492e-06	7.67969e-05
SCARA5	286133	↓	229839_at	-2.97963	7.12117	7.56079e-05	0.00467788	229839_at	-1.90073	8.11343	3.11866e-15	1.03738e-13	A_23_P94103	-2.90027	8.57951	1.22476e-35	1.6947e-32	A_23_P94103	-3.31819	10.5624	1.11054e-18	4.96605e-16
SECTM1	6398	↓	213716_s_at	-2.86005	7.6384	2.85593e-05	0.00273032	213716_s_at	-1.93346	9.40228	4.26754e-19	3.92179e-17	A_24_P48204	-3.00812	10.1148	2.33163e-10	4.06806e-09	A_24_P48204	-2.93865	11.0487	2.98203e-10	1.53986e-08
SLC12A2	6558	↑	204404_at	2.39033	10.2603	5.68334e-05	0.00395504	204404_at	1.87665	10.6964	3.91787e-24	1.38277e-21	A_23_P133606	2.11134	11.4631	2.99928e-14	1.10793e-12	A_32_P25437	1.78738	13.7239	5.58968e-11	3.60264e-09
SLC26A2	1836	↓	205097_at	-4.05719	10.537	0.000539108	0.0131329	224963_at	-2.86923	11.1673	1.88409e-15	6.65073e-14	A_23_P250951	-2.72224	8.65635	1.27337e-08	1.43008e-07	A_23_P250951	-3.1062	9.19164	5.43829e-10	2.60654e-08
SLC4A4	8671	↓	203908_at	-5.14491	7.77462	1.07497e-05	0.00166696	210738_s_at	-4.06164	6.62431	4.47442e-21	7.01165e-19	A_32_P358887	-3.77807	8.50542	1.57269e-11	3.49115e-10	A_32_P358887	-3.74624	9.65339	2.28154e-13	2.78772e-11
SLC51B	123264	↓	230830_at	-4.28079	7.22175	6.56575e-06	0.00126771	230830_at	-3.27012	8.68458	8.04582e-23	2.05776e-20	A_23_P436284	-2.18122	10.4	0.0014238	0.00375352	A_23_P436284	-3.69522	9.57464	4.32525e-15	7.65764e-13
SLC6A6	6533	↑	228754_at	3.1017	8.44581	2.28563e-06	0.000792019	228754_at	1.68017	9.03567	1.6439e-14	4.47002e-13	A_24_P46093	1.69057	9.10037	1.47378e-10	2.70402e-09	A_24_P46093	1.72181	9.77877	1.33385e-09	5.60087e-08
SLCO1B3	28234	↑	206354_at	3.27202	5.30432	0.00404943	0.0379241	206354_at	3.50607	5.53834	3.01406e-13	5.95997e-12	A_23_P105475	3.05155	9.27181	1.15662e-11	2.64335e-10	A_23_P105475	2.29366	8.82842	1.21486e-06	1.74894e-05
SMPDL3A	10924	↓	213624_at	-2.46335	9.9674	1.15245e-05	0.00172198	213624_at	-1.81256	10.6151	3.75705e-17	2.04937e-15	A_32_P223859	-3.0446	7.62987	1.02525e-16	5.58155e-15	A_23_P72117	-1.70671	11.299	4.65626e-09	1.60167e-07
SORD	6652	↑	201563_at	1.88524	9.66632	1.15417e-05	0.00172198	201563_at	1.7407	9.92521	2.92831e-29	6.61555e-26	A_23_P77103	2.0314	11.6386	7.9405e-23	1.1465e-20	A_32_P127153	2.01613	13.0698	2.94975e-14	4.37347e-12
SORD2P	653381	↑	201563_at	1.88524	9.66632	1.15417e-05	0.00172198	201563_at	1.7407	9.92521	2.92831e-29	6.61555e-26	A_23_P77103	2.0314	11.6386	7.9405e-23	1.1465e-20	A_32_P127153	2.01613	13.0698	2.94975e-14	4.37347e-12
SP5	389058	↑	235845_at	1.52602	7.4598	0.000661229	0.0147436	235845_at	1.53458	8.07371	3.57458e-12	5.57898e-11	A_32_P183718	2.58003	10.268	8.98884e-11	1.73351e-09	A_23_P135381	3.36487	11.7212	3.35916e-16	8.05012e-14
SPARCL1	8404	↓	200795_at	-1.6651	8.96088	0.000340763	0.0104549	200795_at	-1.55687	10.049	3.4499e-14	8.6359e-13	A_23_P113351	-3.70223	8.48728	6.6123e-28	2.55335e-25	A_23_P113351	-2.55407	11.4026	2.44301e-15	4.6073e-13
SPIB	6689	↓	205861_at	-2.37705	6.52321	3.29948e-05	0.00294956	205861_at	-2.03837	7.4047	1.3363e-29	4.02523e-26	A_23_P39067	-2.0565	8.86077	3.59462e-19	2.81542e-17	A_23_P39067	-2.76354	8.95956	7.53495e-20	4.4167e-17
SPON1	10418	↓	213994_s_at	-2.54067	6.01468	0.000215622	0.00811943	213993_at	-1.74214	6.89537	9.78234e-08	5.73032e-07	A_32_P133072	-2.78087	10.0335	4.78544e-07	3.50584e-06	A_32_P133072	-1.95804	11.262	6.64158e-05	0.000497127
STMN2	11075	↓	203000_at	-3.46838	6.29325	3.77656e-08	0.00016095	203000_at	-2.01849	7.91366	4.10411e-17	2.21638e-15	A_23_P146274	-4.01101	6.45486	1.97851e-29	1.02663e-26	A_23_P146274	-2.89958	9.37656	9.28284e-12	7.36111e-10
TACSTD2	4070	↑	202286_s_at	5.25908	8.08121	0.000417728	0.0115329	202286_s_at	3.55361	7.45199	4.41185e-15	1.40217e-13	A_23_P149529	2.05001	9.15901	1.22349e-05	5.94712e-05	A_23_P149529	2.98302	10.0689	9.69961e-09	2.97757e-07
TCF21	6943	↓	204931_at	-2.09464	6.58683	3.73578e-05	0.00310433	204931_at	-1.79133	7.63913	6.42422e-15	1.94339e-13	A_23_P156890	-2.46814	5.98456	8.7906e-30	4.78569e-27	A_23_P156890	-1.72854	8.72836	3.29463e-15	6.00454e-13
TCN1	6947	↑	205513_at	6.84291	8.71674	1.44532e-05	0.00191035	205513_at	5.10461	7.74314	1.29562e-19	1.37204e-17	A_23_P64372	4.03443	8.33708	1.27674e-11	2.8981e-10	A_23_P64372	3.90017	10.2451	4.24704e-08	1.03262e-06
TDGF1	6997	↑	206286_s_at	2.56009	8.90078	0.000427038	0.0116146	206286_s_at	2.14197	8.94025	4.30194e-15	1.37207e-13	A_23_P366376	1.65869	9.76396	3.11704e-06	1.794e-05	A_23_P366376	2.06349	10.8969	9.68383e-09	2.97483e-07
TDGF1P3	6998	↑	206286_s_at	2.56009	8.90078	0.000427038	0.0116146	206286_s_at	2.14197	8.94025	4.30194e-15	1.37207e-13	A_23_P366376	1.65869	9.76396	3.11704e-06	1.794e-05	A_23_P366376	2.06349	10.8969	9.68383e-09	2.97483e-07
TESC	54997	↑	218872_at	2.04051	7.85088	0.00667316	0.0499895	218872_at	1.59207	7.53689	1.40256e-09	1.20824e-08	A_23_P76538	1.9175	12.3023	5.07619e-05	0.00020507	A_23_P76538	2.76566	13.5951	7.73805e-09	2.47526e-07
TGFBI	7045	↑	201506_at	2.63384	12.1485	2.29233e-06	0.000792019	201506_at	1.6309	11.7728	3.33218e-19	3.12579e-17	A_23_P156327	1.68657	14.2468	1.10956e-05	5.45565e-05	A_23_P156327	1.83665	15.7664	8.30248e-09	2.62864e-07
TMEM171	134285	↓	1553559_at	-2.00115	6.78609	0.00290441	0.0317775	1553559_at	-1.62231	8.53899	1.03495e-20	1.43885e-18	A_32_P110390	-2.05935	10.1299	1.65699e-13	5.37897e-12	A_32_P110390	-1.72271	11.0937	1.88124e-09	7.54861e-08
TNFSF15	9966	↑	229242_at	2.59863	8.40024	8.59645e-05	0.00509301	229242_at	1.92972	8.36083	1.28357e-19	1.36461e-17	A_32_P158181	2.10271	9.87281	1.35199e-10	2.50968e-09	A_32_P158181	1.87728	10.6615	5.54612e-12	4.68032e-10
TRIM29	23650	↑	202504_at	2.29823	8.83278	0.00096827	0.0181563	202504_at	2.44712	8.55074	1.64888e-16	7.50017e-15	A_23_P203267	1.61045	8.93873	7.23842e-09	8.70629e-08	A_23_P203267	2.03697	9.19042	1.70769e-07	3.30388e-06
TRPM6	140803	↓	224412_s_at	-4.80789	6.71252	0.000114745	0.00600967	224412_s_at	-4.54765	8.05966	6.88404e-23	1.81191e-20	A_23_P216712	-4.57746	8.32208	2.67383e-18	1.85376e-16	A_23_P216712	-3.47255	9.07657	4.30294e-13	4.88598e-11
TSPAN7	7102	↓	202242_at	-2.70179	8.23025	0.000424517	0.0115796	202242_at	-2.23062	9.16676	1.22722e-16	5.75603e-15	A_23_P114185	-2.47251	7.76474	6.27526e-18	4.12663e-16	A_23_P114185	-1.58273	9.32352	4.25684e-07	7.26091e-06
TUBAL3	79861	↓	220310_at	-2.79791	7.55253	0.000588286	0.0138585	220310_at	-2.31248	8.64556	1.42349e-13	3.06763e-12	A_23_P95851	-1.84402	9.66477	2.22125e-08	2.34997e-07	A_23_P95851	-2.18464	10.6645	9.17534e-09	2.85093e-07
UNC5CL	222643	↑	231008_at	2.2311	6.45214	5.80525e-05	0.00401153	231008_at	1.6836	7.13926	4.06826e-14	1.00538e-12	A_23_P428298	2.05997	8.0775	6.01745e-16	2.94306e-14	A_23_P428298	1.60406	9.13296	4.68474e-09	1.60891e-07
ZG16	653808	↓	214142_at	-5.08406	10.4303	0.000381814	0.0111132	214142_at	-3.53187	11.3544	4.67849e-13	8.84143e-12	A_23_P49145	-5.1062	11.4627	4.66539e-09	5.89997e-08	A_23_P49145	-4.73063	13.2628	5.46069e-08	1.27483e-06

## Sheet: Carcinoma vs normal
Carcinoma vs normal
			GSE10714					GSE37364					GSE41657					GSE50114, GSE50115
Gene symbol	Entrez gene	up/down regulated	Probe (Affymetrix Human Genome U133 Plus 2.0 array)	logFC	Average expression	p-value	adjusted p-value	Probe (Affymetrix HG U133 plus 2)	logFC	Average expression	p-value	adjusted p-value	Probe (Agilent Whole Human Genome Microarray 4x44K G4112F)	logFC	Average expression	p-value	adjusted p-value	Probe (Agilent Whole Human Genome Microarray 4x44K G4112F)	logFC	Average expression	p-value	adjusted p-value
ABCG2	9429	↓	209735_at	-2.98037	6.68433	0.000191487	0.00809258	209735_at	-4.69674	8.26726	4.30862e-26	6.48927e-24	A_23_P18713	-2.73515	9.52177	9.17113e-16	5.45814e-14	A_23_P18713	-3.43423	9.12604	2.94945e-13	1.30546e-10
ACADS	35	↓	202366_at	-1.5688	8.37999	0.000623995	0.0150653	202366_at	-1.75884	8.8725	1.5041e-31	1.69901e-28	A_23_P65022	-1.995	9.29239	3.84886e-09	4.81963e-08	A_23_P65022	-2.3223	10.6171	3.85307e-08	1.88422e-06
ADAMDEC1	27299	↓	206134_at	-2.9035	10.3611	1.64785e-05	0.00294249	206134_at	-3.61685	11.1527	1.59797e-22	1.03145e-20	A_23_P256425	-5.47089	8.61885	2.99553e-31	3.31595e-28	A_23_P256425	-3.91991	11.3301	1.63341e-14	1.02682e-11
ADH1B	125	↓	209613_s_at	-3.1633	5.1053	0.00136379	0.0234367	209613_s_at	-4.0982	7.09286	3.41555e-19	1.0032e-17	A_24_P291658	-2.11791	7.92599	4.56232e-19	5.61149e-17	A_24_P291658	-4.05591	9.40758	1.85086e-11	3.97439e-09
AGT	183	↑	202834_at	2.02592	7.80723	0.000558414	0.014323	202834_at	1.68826	8.53828	1.05893e-12	8.59764e-12	A_23_P115261	1.58519	8.87475	0.000178374	0.000678849	A_23_P115261	1.89122	11.067	7.13766e-05	0.000880906
AHCYL2	23382	↓	212814_at	-2.36952	9.56393	8.28895e-05	0.00555449	212814_at	-2.3277	10.7857	1.16843e-22	7.74481e-21	A_24_P72518	-2.8837	11.4568	7.42736e-15	3.64336e-13	A_24_P72518	-2.82823	12.4193	2.50544e-11	5.03129e-09
AJUBA	84962	↑	225806_at	3.52337	6.04816	1.57928e-05	0.00294042	225806_at	3.47858	6.75625	5.33557e-39	7.23236e-35	A_23_P54055	2.02584	8.67946	1.22103e-14	5.67745e-13	A_23_P54055	2.23511	9.20198	1.42287e-10	2.03021e-08
AKAP7	9465	↓	205771_s_at	-2.27299	8.04377	0.00525856	0.0498854	205771_s_at	-1.70935	8.98041	1.29559e-12	1.03518e-11	A_23_P259594	-1.58781	10.4156	1.28731e-07	1.09169e-06	A_23_P259594	-1.69535	10.7837	9.85727e-05	0.00113927
AKR1B10	57016	↓	206561_s_at	-4.17038	9.02563	0.00364281	0.0406007	206561_s_at	-3.88001	10.2527	4.60381e-18	1.0453e-16	A_23_P93641	-3.55974	10.9156	2.86373e-08	2.86882e-07	A_23_P93641	-3.58676	12.3959	1.28118e-07	5.00203e-06
ANLN	54443	↑	222608_s_at	2.61508	7.38011	7.20245e-06	0.00196606	222608_s_at	2.41371	8.4606	1.37268e-23	1.10754e-21	A_23_P356684	2.14508	8.72127	1.68852e-15	9.47227e-14	A_23_P356684	1.52925	9.11234	5.60285e-08	2.59093e-06
ANPEP	290	↓	202888_s_at	-3.77095	7.19047	0.00179489	0.0269435	202888_s_at	-3.46346	9.89487	7.77792e-13	6.45817e-12	A_23_P88626	-2.1331	7.92123	0.00174574	0.00495338	A_23_P88626	-3.1095	9.67469	7.31596e-05	0.000896104
AOC1	26	↓	203559_s_at	-1.72174	11.2046	0.000539861	0.0140825	203559_s_at	-2.05056	11.7377	6.84933e-18	1.49505e-16	A_23_P59452	-1.85962	10.0362	5.43856e-08	5.07329e-07	A_23_P59452	-2.32307	11.5521	4.22673e-10	4.86309e-08
AQP8	343	↓	206784_at	-5.41311	7.76084	0.000669212	0.0156526	206784_at	-6.62324	9.45663	2.47678e-24	2.38104e-22	A_23_P26522	-5.0402	9.26731	1.2129e-13	4.45073e-12	A_23_P26522	-4.97785	9.47654	7.2987e-10	7.57389e-08
ARHGAP44	9912	↓	205414_s_at	-2.1849	7.57014	0.00377469	0.0413683	205414_s_at	-2.41112	8.31325	7.51119e-20	2.52641e-18	A_23_P26854	-2.32997	11.1808	5.13306e-09	6.21904e-08	A_23_P26854	-3.27833	12.7732	4.65761e-09	3.50136e-07
ASCL2	430	↑	229215_at	2.70468	9.76368	8.07918e-06	0.00209357	229215_at	2.01663	9.19389	4.60478e-11	2.85927e-10	A_32_P171061	3.37583	12.9449	4.46246e-13	1.42643e-11	A_32_P171061	1.8211	13.8179	0.00290991	0.0175378
ATP11A	23250	↑	230875_s_at	3.71574	7.45635	2.90193e-07	0.000560571	230875_s_at	2.11676	8.28714	1.29068e-25	1.66621e-23	A_24_P161973	2.42965	8.77813	1.41009e-14	6.41166e-13	A_24_P161973	1.56759	9.57131	9.82288e-09	6.44595e-07
ATP2A3	489	↓	207522_s_at	-2.22156	8.7396	0.000864137	0.0182992	207522_s_at	-1.79765	9.76336	1.55333e-14	1.70352e-13	A_23_P207632	-2.1163	9.73782	2.002e-13	6.95444e-12	A_23_P207632	-2.24956	11.0896	2.25962e-08	1.23911e-06
AURKA	6790	↑	208079_s_at	1.98241	8.3029	3.7447e-05	0.00368741	204092_s_at	1.57758	8.54873	4.33524e-20	1.52436e-18	A_23_P131866	1.59258	10.1425	1.58091e-10	2.7401e-09	A_23_P131866	1.90111	11.364	2.36787e-07	8.22327e-06
BCL2	596	↓	203685_at	-1.62265	7.31996	0.00258494	0.033448	203685_at	-1.58687	7.91479	3.1588e-20	1.14792e-18	A_23_P352266	-2.07515	7.45036	3.33245e-13	1.10226e-11	A_23_P352266	-2.08379	9.49396	2.21809e-09	1.85737e-07
BEST2	54831	↓	207432_at	-4.07632	7.98058	6.85447e-06	0.0019013	207432_at	-3.90965	8.54355	4.41226e-24	4.01397e-22	A_23_P16225	-3.10373	9.14215	3.48334e-20	5.83378e-18	A_23_P16225	-3.91826	10.5122	3.96254e-07	1.25094e-05
BIRC5	332	↑	202095_s_at	1.55271	7.78185	0.00161339	0.025615	202095_s_at	1.68699	8.63013	1.14303e-20	4.6044e-19	A_23_P118815	1.73151	12.5028	2.14837e-10	3.61849e-09	A_23_P118815	1.79957	13.4575	1.75807e-08	1.02086e-06
C1orf115	79762	↓	218546_at	-1.5315	8.72805	0.00211234	0.0295667	218546_at	-2.37026	9.5615	2.67114e-22	1.62001e-20	A_23_P160433	-1.90264	8.29272	1.20664e-08	1.33216e-07	A_23_P160433	-2.00475	9.86844	2.92307e-09	2.35671e-07
C2orf88	84281	↓	228195_at	-2.89263	7.75957	0.000896385	0.0186015	228195_at	-3.69907	8.50693	1.80815e-28	5.76693e-26	A_23_P17130	-3.84569	7.99793	2.4724e-19	3.19478e-17	A_23_P17130	-2.70772	8.81271	3.37216e-13	1.44822e-10
CA1	759	↓	205950_s_at	-4.87928	8.66871	0.000348392	0.0112479	205950_s_at	-6.4119	10.2399	6.57851e-24	5.75524e-22	A_23_P168916	-7.45551	10.0968	2.11614e-19	2.77767e-17	A_23_P168916	-7.55418	10.3143	9.96355e-11	1.52176e-08
CA12	771	↓	203963_at	-2.40339	10.9925	0.00456141	0.0459982	204508_s_at	-2.28928	10.4624	1.92579e-16	3.01607e-15	A_24_P330518	-2.60282	10.1412	8.27994e-12	1.97535e-10	A_23_P372234	-2.64622	13.9231	3.44396e-07	1.11565e-05
CA2	760	↓	209301_at	-4.19656	10.0064	0.00524593	0.049865	209301_at	-4.15568	11.5697	4.87652e-15	5.84192e-14	A_23_P8913	-3.62877	11.9677	3.2014e-19	4.04241e-17	A_23_P8913	-5.79391	11.8404	1.10899e-11	2.54516e-09
CA4	762	↓	206209_s_at	-4.20202	7.57829	0.00469919	0.0467876	206209_s_at	-5.39121	9.30099	1.15158e-19	3.71216e-18	A_23_P4096	-4.86609	9.56059	6.9944e-11	1.32051e-09	A_23_P4096	-5.5395	9.88446	2.6767e-10	3.3752e-08
CA7	766	↓	207504_at	-3.16775	7.11682	6.50758e-07	0.000720641	207504_at	-2.47769	7.86632	5.73249e-26	8.26637e-24	A_23_P106656	-2.36555	8.46359	1.69551e-31	2.08541e-28	A_23_P106656	-2.64775	8.12217	2.18568e-20	1.5801e-16
CD36	948	↓	206488_s_at	-1.62469	5.78906	0.000105858	0.00616796	228766_at	-2.18981	6.47858	7.20216e-14	7.0513e-13	A_23_P111583	-3.70623	6.83407	1.76798e-32	2.79585e-29	A_23_P111583	-2.05594	9.08397	9.80614e-11	1.50834e-08
CDC25B	994	↑	201853_s_at	2.28135	9.40435	0.000310773	0.0104443	201853_s_at	2.0491	9.79467	2.7884e-23	2.10567e-21	A_23_P210726	1.85769	10.5864	1.05358e-14	4.9912e-13	A_23_P210726	1.54939	11.8009	3.29531e-05	0.000467881
CDC6	990	↑	203967_at	2.07068	5.69472	0.000358577	0.0113951	203967_at	1.91177	7.22534	1.92428e-18	4.82138e-17	A_23_P49972	1.60259	9.27927	1.83267e-11	4.02255e-10	A_23_P49972	1.92262	10.5907	1.71461e-10	2.36104e-08
CDHR5	53841	↓	220075_s_at	-2.60414	7.81043	0.000570638	0.014416	220075_s_at	-3.62729	9.31055	3.7488e-19	1.09045e-17	A_23_P202683	-2.13879	11.1393	2.74988e-08	2.77402e-07	A_23_P202683	-3.21932	12.1168	3.75769e-12	1.02512e-09
CDKN2B	1030	↓	236313_at	-2.3211	7.71548	0.0014228	0.0239978	236313_at	-3.71875	8.93687	2.02251e-21	9.80862e-20	A_24_P360674	-3.56177	7.74536	1.26734e-14	5.83177e-13	A_24_P360674	-2.28271	8.53853	4.40608e-11	8.03016e-09
CEMIP	57214	↑	212942_s_at	4.8495	8.44154	1.4622e-06	0.000913372	212942_s_at	4.92366	8.58088	8.52339e-39	7.7023e-35	A_23_P324754	3.79356	9.56543	3.05151e-20	5.27799e-18	A_32_P161855	3.92585	12.2505	3.26475e-10	3.92277e-08
CHGA	1113	↓	204697_s_at	-3.00676	7.45195	1.81311e-05	0.00294249	204697_s_at	-3.10539	9.95714	1.95924e-31	1.7705e-28	A_32_P27046	-3.28511	9.29675	1.23794e-32	2.05554e-29	A_32_P27046	-4.33293	9.65218	2.62549e-15	1.96351e-12
CHP2	63928	↓	206149_at	-3.10461	8.29759	0.000604782	0.0148743	206149_at	-3.99382	9.20343	9.09586e-26	1.22076e-23	A_23_P349463	-4.48167	12.8409	1.26677e-11	2.88731e-10	A_23_P349463	-4.597	13.9192	1.13721e-06	2.93441e-05
CKB	1152	↓	200884_at	-2.57619	11.0331	0.00104728	0.0201221	200884_at	-2.25133	11.6677	2.44029e-13	2.17835e-12	A_23_P25674	-3.01529	13.7083	7.17805e-09	8.38171e-08	A_23_P25674	-2.43241	15.0496	0.000330594	0.00304068
CLCA1	1179	↓	210107_at	-4.74735	12.3381	0.000229953	0.00896131	210107_at	-5.8953	11.914	6.50847e-21	2.79185e-19	A_23_P51217	-6.56824	11.57	2.79401e-10	4.59793e-09	A_23_P51217	-6.81092	14.7094	4.24349e-12	1.14205e-09
CLDN1	9076	↑	222549_at	4.22988	7.59435	1.62324e-06	0.000913372	222549_at	3.90249	8.0129	4.43317e-35	1.33537e-31	A_23_P57784	4.22527	8.876	9.53695e-22	2.39934e-19	A_23_P57784	2.72269	9.30007	3.47247e-09	2.7129e-07
CLDN23	137075	↓	228706_s_at	-2.04205	6.31553	0.00021429	0.00864802	228706_s_at	-3.12962	8.03104	2.24209e-24	2.1631e-22	A_23_P134854	-2.94999	9.91452	1.46178e-13	5.2537e-12	A_23_P134854	-2.68713	10.8232	3.78394e-13	1.54118e-10
CLDN8	9073	↓	214598_at	-5.48052	6.08433	5.19049e-06	0.00163769	214598_at	-5.03648	7.90542	1.00152e-18	2.66973e-17	A_23_P427014	-5.44527	7.2902	4.47207e-26	2.34469e-23	A_23_P427014	-2.19439	7.96839	0.000148032	0.00158583
CMBL	134147	↓	227522_at	-1.6934	10.5809	0.00196649	0.0284347	227522_at	-1.92372	11.3779	3.55169e-14	3.67085e-13	A_23_P144668	-1.90008	10.2268	5.14404e-07	3.75282e-06	A_23_P144668	-1.63511	11.2174	0.00766276	0.0371904
CPM	1368	↓	235706_at	-2.41181	7.94601	0.000160353	0.00734418	235019_at	-2.39095	8.22444	9.9129e-18	2.08002e-16	A_23_P162668	-3.19322	7.85182	2.5543e-14	1.08473e-12	A_23_P162668	-2.17354	9.16445	2.80166e-11	5.52385e-09
CRNDE	101927480	↑	238021_s_at	4.23442	6.79987	1.18824e-07	0.000400251	238021_s_at	3.90007	6.2847	2.08531e-24	2.06324e-22	A_32_P104063	2.21333	8.94577	7.91744e-08	7.04718e-07	A_32_P104063	2.51352	9.71798	6.25992e-05	0.000791633
CSE1L	1434	↑	201111_at	1.86139	7.61425	0.0025319	0.0329902	201111_at	1.75367	8.34578	1.31458e-22	8.60827e-21	A_23_P17393	1.5697	12.0805	4.42876e-13	1.41964e-11	A_23_P17393	1.67731	13.2793	2.43516e-10	3.12507e-08
CWH43	80157	↓	220724_at	-4.03131	6.03383	0.000307347	0.0103921	220724_at	-4.38671	6.72218	6.77019e-23	4.67023e-21	A_23_P110319	-4.55723	7.97681	2.83862e-18	2.83939e-16	A_23_P110319	-4.33491	9.88375	2.05224e-10	2.69957e-08
CXCL12	6387	↓	209687_at	-3.3037	7.1139	0.00197683	0.0285005	209687_at	-3.38856	8.36055	1.61143e-26	2.87407e-24	A_23_P202448	-3.91048	7.29609	1.04022e-35	3.14043e-32	A_23_P202448	-4.1991	10.1159	1.02791e-16	1.0689e-13
DDIT4	54541	↑	202887_s_at	1.56898	9.86602	0.00115684	0.0214313	202887_s_at	2.13068	10.4396	4.84514e-27	9.9509e-25	A_23_P104318	2.29365	12.6581	7.98489e-14	3.0484e-12	A_23_P104318	1.57958	13.3765	0.000653414	0.00529272
DHRS11	79154	↓	218756_s_at	-3.22144	8.7388	0.000480935	0.0130822	218756_s_at	-3.11976	10.0022	1.36135e-29	6.71022e-27	A_23_P27005	-1.90641	9.66406	7.71014e-17	5.74094e-15	A_23_P27005	-2.52812	10.3721	1.24981e-11	2.82352e-09
DNASE1L3	1776	↓	205554_s_at	-1.66056	8.68986	0.00344402	0.0393654	205554_s_at	-2.94841	9.16965	3.85385e-19	1.11741e-17	A_23_P257993	-4.15052	9.26593	1.33269e-27	8.43593e-25	A_23_P257993	-3.43348	11.7251	5.91861e-11	1.03103e-08
ECT2	1894	↑	219787_s_at	2.27356	8.40543	2.80475e-06	0.00122748	219787_s_at	1.89692	9.27067	2.18879e-22	1.37039e-20	A_23_P9574	1.7241	12.2839	3.60335e-12	9.31235e-11	A_23_P9574	1.76468	12.9198	4.60443e-07	1.41546e-05
EDN3	1908	↓	208399_s_at	-2.65631	6.36412	6.11644e-05	0.00489663	208399_s_at	-3.57611	7.78203	1.6077e-21	8.0119e-20	A_23_P17438	-3.59121	7.04856	5.05674e-15	2.5756e-13	A_23_P17438	-2.54341	8.3812	8.90747e-11	1.41065e-08
ENDOD1	23052	↓	212570_at	-2.28424	7.0924	0.00174838	0.0266245	212573_at	-1.6388	9.60564	6.88476e-21	2.92091e-19	A_23_P104624	-2.4901	10.9671	4.19455e-19	5.23672e-17	A_24_P189533	-1.56482	11.3832	1.23548e-06	3.14867e-05
ETFDH	2110	↓	228469_at	-2.06166	6.97695	3.4976e-06	0.00143504	228469_at	-2.33818	8.07118	4.95485e-26	7.30032e-24	A_23_P61447	-1.79203	10.4186	2.05731e-13	7.1168e-12	A_23_P61447	-1.73164	11.6659	3.06839e-09	2.44659e-07
ETV4	2118	↑	1554576_a_at	1.94676	7.63671	2.73652e-05	0.0032981	1554576_a_at	2.81278	7.93525	6.91334e-25	7.68117e-23	A_24_P416346	2.34697	8.04969	1.30183e-12	3.75281e-11	A_23_P431776	2.69454	8.9529	1.98374e-08	1.1248e-06
F13A1	2162	↓	203305_at	-2.41507	6.84496	5.77477e-05	0.004661	203305_at	-2.05359	8.048	1.29331e-14	1.43518e-13	A_32_P140139	-2.57857	7.85971	9.61181e-27	5.59998e-24	A_32_P140139	-2.83637	9.5588	1.19638e-10	1.75318e-08
FAM3D	131177	↓	227676_at	-2.34812	11.4	0.000663926	0.0155844	227676_at	-1.51407	11.5352	2.63718e-13	2.3387e-12	A_23_P41145	-2.13324	15.7737	1.78745e-10	3.06292e-09	A_23_P41145	-2.37308	16.5484	1.04086e-08	6.71851e-07
FAM83D	81610	↑	225687_at	2.08341	8.09359	2.87092e-05	0.00332588	225687_at	1.87012	8.6137	3.30603e-19	9.742e-18	A_23_P323751	1.53672	8.40358	5.21142e-09	6.30248e-08	A_23_P323751	1.88761	9.80597	1.93808e-09	1.67185e-07
FOXQ1	94234	↑	227475_at	4.97887	9.88215	3.20032e-05	0.00348025	227475_at	4.49681	9.34696	1.46703e-31	1.69901e-28	A_32_P164246	4.06682	10.2422	4.62098e-16	2.92859e-14	A_32_P164246	4.28471	10.9765	2.98439e-11	5.75337e-09
FUCA1	2517	↓	202838_at	-1.89807	11.2954	0.00064607	0.0153486	202838_at	-1.76563	12.0099	4.38421e-22	2.4456e-20	A_23_P11543	-1.97616	12.7704	2.6811e-15	1.45485e-13	A_23_P11543	-2.0911	14.1605	1.30368e-09	1.20906e-07
GCG	2641	↓	206422_at	-5.55564	6.47974	0.000263986	0.00964553	206422_at	-5.64704	7.34788	2.19472e-24	2.14797e-22	A_23_P254664	-6.66258	7.5636	2.65489e-46	4.4083e-42	A_23_P254664	-3.7651	8.64621	1.9792e-08	1.12369e-06
GDF15	9518	↑	221577_x_at	2.67864	9.31345	3.98204e-05	0.00382548	221577_x_at	3.25842	9.36793	3.70385e-23	2.72117e-21	A_23_P16523	2.79624	14.9785	9.1267e-17	6.64668e-15	A_23_P16523	2.03324	15.6099	5.56615e-05	0.00071942
GPA33	10223	↓	205929_at	-1.94107	11.353	7.76166e-05	0.00536344	205929_at	-1.88856	11.9511	6.00514e-17	1.05508e-15	A_24_P319374	-1.79361	14.0822	9.64331e-10	1.39845e-08	A_24_P319374	-2.146	15.422	1.2718e-09	1.19406e-07
GPAT3	84803	↓	224480_s_at	-1.77489	6.93506	0.0019759	0.0285005	224480_s_at	-2.03486	8.25148	5.60634e-17	9.93384e-16	A_23_P69810	-1.78484	9.04211	9.12822e-13	2.73591e-11	A_23_P69810	-1.82034	9.93046	3.44189e-08	1.71801e-06
GTF2IRD1	9569	↑	218412_s_at	1.69032	8.85313	2.01708e-06	0.00104538	218412_s_at	1.56682	9.215	1.07138e-28	3.7721e-26	A_23_P111621	2.06862	10.8908	1.1093e-20	2.19278e-18	A_23_P111621	1.9107	12.1299	1.67354e-09	1.49983e-07
GUCA2A	2980	↓	207003_at	-4.3809	9.52792	0.000376031	0.0116439	207003_at	-5.0137	10.5811	3.32761e-30	2.0047e-27	A_23_P11968	-5.21559	9.06387	7.00522e-26	3.47219e-23	A_23_P11968	-4.86072	9.36857	9.6843e-14	4.82835e-11
GUCA2B	2981	↓	207502_at	-4.24769	6.67247	0.000240474	0.00917811	207502_at	-4.53667	8.40193	1.89104e-31	1.76779e-28	A_23_P63032	-5.82741	8.20927	5.25498e-30	4.71655e-27	A_23_P63032	-5.15559	8.80262	8.85718e-16	7.53312e-13
HAPLN1	1404	↓	230204_at	-2.32492	5.87688	3.23849e-05	0.00348025	205523_at	-2.79343	6.17285	3.56767e-25	4.18995e-23	A_23_P7727	-2.70063	7.41068	5.86285e-31	6.08436e-28	A_23_P7727	-2.21054	8.93216	2.84809e-08	1.48306e-06
HEPACAM2	253012	↓	242601_at	-5.11124	9.06295	7.52078e-05	0.00535206	242601_at	-4.57622	9.42001	3.25746e-20	1.17903e-18	A_32_P118397	-4.40025	10.1852	1.26758e-16	8.95642e-15	A_32_P118397	-4.01984	11.852	2.12876e-09	1.79994e-07
HIGD1A	25994	↓	242317_at	-2.61161	7.52735	3.57071e-05	0.0036436	242317_at	-2.35002	9.08354	1.18105e-27	2.85877e-25	A_24_P200162	-2.52454	13.6185	1.62171e-15	9.15907e-14	A_24_P200162	-1.65457	14.3081	1.00263e-08	6.51724e-07
HILPDA	29923	↑	218507_at	1.68871	8.02379	1.20746e-05	0.00255697	1554452_a_at	1.91194	8.69199	2.0931e-22	1.31963e-20	A_23_P20022	1.74258	11.3155	2.37924e-05	0.000114295	A_23_P20022	1.87671	12.2398	5.88135e-10	6.299e-08
HMGCS2	3158	↓	240110_at	-2.73152	7.01407	8.62819e-05	0.0056453	204607_at	-3.44537	11.8301	6.25918e-17	1.09405e-15	A_23_P103588	-2.54731	11.4031	3.08011e-06	1.85303e-05	A_23_P103588	-3.75726	12.9459	3.52749e-06	7.4096e-05
HPGD	3248	↓	203913_s_at	-2.3644	7.97291	4.97235e-05	0.00426109	211548_s_at	-3.06159	10.295	1.66476e-16	2.63311e-15	A_24_P71904	-3.28112	7.29622	2.50998e-11	5.34662e-10	A_23_P213050	-2.32778	9.95748	1.14628e-08	7.23739e-07
HSD11B2	3291	↓	204130_at	-2.83884	10.1806	6.66228e-05	0.00510533	204130_at	-3.0169	10.7475	1.96887e-27	4.56206e-25	A_23_P14986	-2.26227	12.077	3.89577e-13	1.26838e-11	A_23_P14986	-3.31291	13.7957	1.34977e-15	1.12592e-12
IFITM2	10581	↑	201315_x_at	1.8788	11.3449	0.00421236	0.0439747	201315_x_at	1.77399	11.546	3.01359e-25	3.61497e-23	A_23_P72737	2.68407	14.3762	1.1074e-14	5.20165e-13	A_23_P72737	1.54975	15.7617	1.32937e-05	0.000221269
IGF1	3479	↓	209541_at	-2.07122	6.73845	0.00115294	0.0214313	209541_at	-2.18676	7.41825	1.73257e-16	2.72923e-15	A_23_P13907	-2.2605	6.64685	3.0001e-32	4.52865e-29	A_23_P13907	-1.8758	8.52923	6.25919e-15	4.37901e-12
INHBA	3624	↑	227140_at	5.1713	6.50188	7.95532e-08	0.000400251	227140_at	6.15487	6.25277	1.79115e-43	4.85581e-39	A_23_P122924	2.7068	7.87399	6.87807e-12	1.67214e-10	A_23_P122924	4.4431	10.0184	1.9401e-12	5.84402e-10
ISX	91464	↓	232707_at	-2.47261	8.32246	0.000803463	0.0175038	232707_at	-3.93736	9.08373	4.758e-25	5.46565e-23	A_32_P217140	-2.99551	11.0737	3.08345e-10	5.02341e-09	A_32_P217140	-3.19372	12.4327	1.77476e-08	1.02783e-06
ITLN1	55600	↓	223597_at	-4.78479	10.4623	0.000915574	0.0187631	223597_at	-4.54118	10.6331	1.93363e-16	3.0266e-15	A_23_P95790	-7.3619	11.671	2.63484e-12	7.04513e-11	A_23_P95790	-6.05047	14.599	6.34864e-08	2.84482e-06
ITM2C	81618	↓	221004_s_at	-1.53846	11.7539	0.000108595	0.00618115	221004_s_at	-1.98946	12.0805	4.47538e-18	1.02214e-16	A_24_P379820	-3.20747	12.0663	5.77721e-13	1.80825e-11	A_24_P379820	-3.29668	13.6095	6.0138e-11	1.04342e-08
KCNMA1	3778	↓	221584_s_at	-2.03001	8.33631	0.000950529	0.0191408	221584_s_at	-1.70052	8.80283	7.47983e-16	1.04687e-14	A_24_P156490	-2.24261	8.27328	9.29521e-19	1.05353e-16	A_24_P156490	-1.86883	9.49625	6.48144e-10	6.87381e-08
KIF16B	55614	↓	232083_at	-1.51659	7.95733	0.000757816	0.0169642	232083_at	-1.89751	9.15109	1.12785e-16	1.85421e-15	A_23_P28906	-1.90824	8.64893	3.67013e-11	7.48197e-10	A_23_P28906	-2.01189	9.98688	2.02722e-09	1.72756e-07
KLF4	9314	↓	220266_s_at	-2.15642	8.46294	0.00163498	0.0257183	220266_s_at	-2.00519	10.0082	1.00214e-13	9.57631e-13	A_23_P32233	-2.04009	10.0156	1.44345e-16	1.00681e-14	A_23_P32233	-2.64085	11.6857	8.7845e-10	8.77964e-08
KRT20	54474	↓	213953_at	-1.99368	12.2586	0.00225031	0.030606	213953_at	-2.36413	12.8389	8.08506e-12	5.70648e-11	A_23_P66854	-2.25645	13.6013	4.07773e-09	5.07372e-08	A_23_P66854	-2.81491	13.0525	1.88399e-06	4.41969e-05
KRT23	25984	↑	218963_s_at	3.1198	6.47729	0.00261153	0.0336153	218963_s_at	3.63124	6.3479	9.41064e-16	1.28915e-14	A_23_P78248	2.96356	9.31257	9.20661e-08	8.07987e-07	A_23_P78248	4.44414	9.88465	6.10337e-06	0.000116946
LAMA1	284217	↓	227048_at	-4.12542	6.49142	0.00106	0.020267	227048_at	-2.82557	7.46238	3.98472e-16	5.87735e-15	A_32_P313405	-3.95942	8.33751	1.5674e-15	8.89772e-14	A_32_P313405	-1.87923	8.91467	0.00031082	0.00290501
LDHD	197257	↓	229241_at	-2.43906	5.68691	3.70281e-06	0.00145846	229241_at	-1.90873	6.94914	5.46152e-17	9.70897e-16	A_23_P54918	-3.52702	9.87678	7.62388e-14	2.93034e-12	A_23_P54918	-3.76479	11.312	6.42541e-09	4.56151e-07
LGALS2	3957	↓	208450_at	-2.3515	8.02141	0.00100789	0.0197505	208450_at	-2.37392	8.6841	7.1957e-13	6.00417e-12	A_23_P120902	-4.47185	12.0274	1.50526e-10	2.62268e-09	A_23_P120902	-2.99307	13.6499	0.000839603	0.00648595
LYPD8	646627	↓	238143_at	-4.17968	10.2256	0.000454519	0.0126074	238143_at	-4.05917	10.7683	1.11284e-21	5.68155e-20	A_24_P164998	-5.16813	9.04268	3.10261e-12	8.1386e-11	A_24_P164998	-4.42492	10.911	6.50772e-11	1.10698e-08
MACC1	346389	↑	232151_at	3.27474	7.09426	4.17197e-07	0.000560571	232151_at	1.59514	7.92454	5.66724e-16	8.14628e-15	A_32_P144599	2.19138	7.869	1.60146e-16	1.10338e-14	A_32_P158272	1.61759	9.34236	4.58002e-06	9.22297e-05
MAOA	4128	↓	204388_s_at	-2.50944	9.48118	8.61787e-05	0.0056453	212741_at	-1.97226	11.6651	1.67386e-24	1.70595e-22	A_23_P83857	-2.42288	11.5447	8.95834e-12	2.11291e-10	A_23_P83857	-2.0029	12.9813	7.02387e-07	1.98222e-05
MATN2	4147	↓	202350_s_at	-2.32225	8.71339	0.000181076	0.00785814	202350_s_at	-1.96669	9.61306	4.07878e-16	6.00302e-15	A_23_P71328	-1.82608	8.15823	4.18051e-10	6.57653e-09	A_23_P71328	-2.10338	9.93915	1.29783e-05	0.000217186
MB	4151	↓	204179_at	-2.30636	7.52338	3.07209e-07	0.000560571	204179_at	-2.26747	8.08412	1.23248e-17	2.53509e-16	A_23_P6433	-2.48026	7.49736	2.57158e-12	6.88707e-11	A_23_P6433	-2.29086	9.96408	3.40456e-06	7.18619e-05
MEP1A	4224	↓	206000_at	-1.99916	9.44919	0.00365646	0.0407068	206000_at	-2.80224	10.5476	8.72312e-13	7.16618e-12	A_23_P93122	-2.30644	11.0437	4.86981e-06	2.77872e-05	A_24_P154868	-2.48172	11.4954	3.67324e-05	0.000512811
MET	4233	↑	203510_at	1.6292	10.1193	0.000141882	0.00691988	213816_s_at	1.68971	6.43863	1.50481e-12	1.1925e-11	A_23_P359245	2.08095	12.6413	2.1167e-17	1.79779e-15	A_23_P359245	1.53728	13.0403	2.35188e-06	5.26665e-05
METTL7A	25840	↓	207761_s_at	-2.49582	10.4983	7.00813e-05	0.00521452	207761_s_at	-2.50455	11.0105	1.45331e-24	1.52121e-22	A_23_P415021	-3.41648	11.3622	3.12331e-14	1.29815e-12	A_23_P415021	-3.15892	12.7603	5.42151e-12	1.39978e-09
MFSD4A	148808	↓	229254_at	-2.59553	7.97834	0.00181451	0.0270924	229254_at	-2.77368	8.73715	7.79704e-14	7.59532e-13	A_24_P51115	-3.75534	7.47936	1.22804e-20	2.38491e-18	A_24_P51115	-2.11411	8.96714	5.59319e-06	0.000108745
MIR3189	100422943	↑	221577_x_at	2.67864	9.31345	3.98204e-05	0.00382548	221577_x_at	3.25842	9.36793	3.70385e-23	2.72117e-21	A_23_P16523	2.79624	14.9785	9.1267e-17	6.64668e-15	A_23_P16523	2.03324	15.6099	5.56615e-05	0.00071942
MIR4680	100616113	↓	212594_at	-1.91348	8.86222	3.97506e-07	0.000560571	212594_at	-2.07799	9.3209	8.5879e-27	1.63956e-24	A_23_P258862	-2.21848	12.272	5.00578e-17	3.88404e-15	A_23_P258862	-2.10648	12.6464	4.4094e-10	5.04649e-08
MMP1	4312	↑	204475_at	4.5311	7.22479	0.00235699	0.0314276	204475_at	5.2099	8.88663	4.57445e-21	2.02968e-19	A_23_P1691	3.61159	11.1215	4.4068e-07	3.27175e-06	A_23_P1691	5.08176	12.8107	6.87749e-08	3.01484e-06
MMP28	79148	↓	219909_at	-2.62079	5.7076	5.67753e-05	0.0046298	219909_at	-2.79574	7.0763	2.33457e-18	5.67625e-17	A_23_P26890	-1.91897	9.24965	3.10644e-17	2.51614e-15	A_23_P26890	-2.37114	9.25338	2.22857e-06	5.05313e-05
MMP3	4314	↑	205828_at	5.11289	7.22111	0.00397232	0.0426095	205828_at	6.52138	8.27528	1.66705e-24	1.70595e-22	A_23_P161698	4.42622	8.59149	1.51285e-09	2.09644e-08	A_23_P161698	5.1427	11.4442	5.1229e-07	1.52722e-05
MMP7	4316	↑	204259_at	3.94045	8.78573	0.00141793	0.0239978	204259_at	3.00766	8.17913	2.65139e-16	4.05182e-15	A_23_P52761	4.94763	11.2336	4.80676e-14	1.92787e-12	A_23_P52761	3.96106	11.7034	8.1275e-07	2.22002e-05
MOGAT2	80168	↓	232428_at	-3.36313	8.36668	6.62733e-05	0.00509838	232428_at	-3.34665	9.17237	2.96125e-25	3.5839e-23	A_24_P278603	-2.47826	8.18629	5.3482e-15	2.71158e-13	A_23_P203698	-2.38348	10.1371	1.72331e-08	1.00336e-06
MS4A12	54860	↓	220834_at	-5.06973	8.21097	0.00124719	0.0220055	220834_at	-6.88445	9.36207	3.10852e-19	9.21006e-18	A_23_P127760	-4.51781	8.01791	1.22629e-18	1.34402e-16	A_23_P127760	-3.64775	8.55843	4.03161e-09	3.09513e-07
MT1M	4499	↓	217546_at	-5.33909	8.03732	0.000397952	0.0117506	217546_at	-4.38393	8.44445	7.09773e-18	1.54059e-16	A_24_P74828	-3.28357	9.26691	2.29798e-20	4.10288e-18	A_24_P74828	-2.36466	9.35536	0.000891194	0.00679733
MTHFD1L	25902	↑	225520_at	2.50938	7.88291	2.11935e-05	0.00297517	225520_at	2.24421	7.97833	4.99834e-27	1.01883e-24	A_24_P235049	2.31391	8.26715	6.19762e-14	2.42995e-12	A_24_P235049	1.72416	9.35727	1.60412e-07	6.01998e-06
MYC	4609	↑	202431_s_at	2.05065	10.4159	0.00152734	0.0250244	202431_s_at	2.01019	10.7901	9.32378e-31	7.02132e-28	A_23_P215956	2.86118	12.1575	4.42155e-19	5.47893e-17	A_23_P215956	1.98857	13.3023	6.94768e-07	1.96327e-05
MYO1A	4640	↓	211916_s_at	-1.90612	8.48061	0.0010453	0.0201221	211916_s_at	-2.10354	9.53216	2.64141e-19	7.94767e-18	A_23_P162288	-1.78842	12.5521	2.30272e-09	3.04908e-08	A_23_P162288	-2.03349	13.8032	5.83605e-06	0.000112659
NAAA	27163	↓	227135_at	-2.19945	8.53169	0.00150135	0.0247843	227135_at	-2.13465	9.46611	7.48611e-22	3.9872e-20	A_24_P354488	-2.79819	9.5074	9.57533e-17	6.95814e-15	A_24_P354488	-1.70175	11.0533	2.25929e-06	5.1121e-05
NAT2	10	↓	206797_at	-2.47547	9.15705	0.00153754	0.0251081	206797_at	-2.43182	9.51627	2.84022e-21	1.31847e-19	A_23_P31798	-1.61348	9.10517	1.60172e-10	2.76895e-09	A_23_P31798	-1.88273	9.82465	1.03474e-07	4.22229e-06
NEBL	10529	↑	203962_s_at	2.19888	9.18555	0.000305525	0.0103811	203962_s_at	2.08401	9.10473	1.26427e-23	1.04495e-21	A_24_P398147	1.53207	9.45888	3.40326e-12	8.85035e-11	A_23_P104522	2.16764	9.3989	3.29118e-09	2.58153e-07
NFE2L3	9603	↑	204702_s_at	2.29936	7.34831	3.81798e-08	0.000400251	204702_s_at	2.29849	8.39196	1.08336e-31	1.35424e-28	A_23_P42718	3.03418	11.5281	1.59992e-24	6.72553e-22	A_23_P42718	2.69653	12.3021	4.81467e-12	1.2657e-09
NR3C2	4306	↓	205259_at	-2.57756	9.02188	2.35654e-05	0.00310237	205259_at	-2.9091	9.74915	1.73208e-23	1.37703e-21	A_23_P392470	-2.307	8.74718	3.8285e-11	7.76212e-10	A_23_P392470	-2.82639	10.1944	5.96747e-14	3.19562e-11
NXPE1	120400	↓	1553828_at	-3.1373	8.87653	0.000518782	0.0137509	1553828_at	-2.71566	9.87426	3.69389e-17	6.84026e-16	A_23_P24543	-3.86558	10.1357	2.92674e-12	7.73839e-11	A_23_P24543	-3.4303	11.3712	6.10715e-12	1.54014e-09
PADI2	11240	↓	209791_at	-2.9187	9.24197	1.75042e-05	0.00294249	209791_at	-3.3712	10.6123	6.42487e-28	1.74178e-25	A_24_P187970	-2.26987	6.81436	3.83484e-16	2.47284e-14	A_23_P201747	-3.26037	9.84597	3.24444e-10	3.91438e-08
PBLD	64081	↓	219543_at	-1.78138	9.73942	0.000323712	0.0107871	219543_at	-2.8818	10.1188	1.38214e-20	5.50051e-19	A_24_P112395	-2.09477	8.87667	7.43793e-10	1.10567e-08	A_23_P149998	-2.3633	10.3673	4.38498e-08	2.11205e-06
PCK1	5105	↓	208383_s_at	-3.85172	8.30336	9.4053e-05	0.00584315	208383_s_at	-3.8337	10.0029	2.74174e-16	4.17341e-15	A_23_P408249	-3.51836	9.10816	6.93501e-12	1.68106e-10	A_23_P408249	-2.75339	9.87341	3.10028e-05	0.000446177
PDCD4	27250	↓	212594_at	-1.91348	8.86222	3.97506e-07	0.000560571	212594_at	-2.07799	9.3209	8.5879e-27	1.63956e-24	A_23_P258862	-2.21848	12.272	5.00578e-17	3.88404e-15	A_23_P258862	-2.10648	12.6464	4.4094e-10	5.04649e-08
PDE9A	5152	↓	205593_s_at	-2.09044	8.62887	0.000896091	0.0186015	205593_s_at	-2.17356	9.26167	1.79604e-18	4.52234e-17	A_23_P29096	-1.89876	8.96086	3.91237e-11	7.89823e-10	A_23_P29096	-1.98853	11.18	1.83162e-06	4.32725e-05
PHF19	26147	↑	227212_s_at	2.12719	7.82205	8.29197e-05	0.00555449	227211_at	1.55438	7.6139	9.96574e-24	8.52275e-22	A_23_P401904	1.9253	10.1096	3.46397e-16	2.24678e-14	A_23_P401904	2.07415	11.3061	3.43159e-11	6.44366e-09
PHLDA1	22822	↑	225842_at	3.11918	8.44695	1.15745e-05	0.00250493	217996_at	3.23791	8.98933	1.84956e-31	1.76779e-28	A_23_P76450	2.7178	9.72521	2.62877e-11	5.58176e-10	A_23_P76450	2.1871	10.6541	1.42102e-06	3.52419e-05
PHLPP2	23035	↓	213407_at	-1.69689	8.09709	0.0022972	0.030977	213407_at	-2.52097	9.35422	5.6904e-31	4.53726e-28	A_23_P418234	-2.2	8.29936	1.43017e-14	6.47948e-13	A_23_P418234	-1.98683	9.22851	1.17643e-12	3.69775e-10
PIGZ	80235	↓	220041_at	-1.59514	9.20698	0.00194423	0.0282581	220041_at	-2.18205	9.47007	2.93878e-18	7.01323e-17	A_23_P143935	-1.81105	12.5763	1.93561e-08	2.0316e-07	A_23_P143935	-2.41523	13.4259	6.69715e-08	2.96424e-06
PKIB	5570	↓	231120_x_at	-3.5258	5.29474	6.15655e-05	0.00490879	231120_x_at	-4.69755	6.97717	9.21874e-26	1.23113e-23	A_23_P145529	-4.84027	8.79099	1.10626e-13	4.11399e-12	A_23_P145529	-4.27274	9.81873	3.13668e-12	8.79471e-10
PLA2G10	8399	↓	207222_at	-1.90006	9.19802	0.00330284	0.0383752	207222_at	-2.05257	9.07543	1.48504e-13	1.37849e-12	A_23_P88767	-2.86935	10.2041	1.79827e-12	5.00997e-11	A_23_P88767	-2.7305	11.2838	6.76029e-09	4.7325e-07
PLCE1	51196	↓	205112_at	-1.84288	7.70293	0.000384266	0.0117274	205112_at	-2.52147	8.5674	8.31317e-21	3.47257e-19	A_23_P35617	-1.92979	9.95256	2.14129e-13	7.37656e-12	A_23_P35617	-2.68441	11.0869	1.29533e-10	1.8918e-08
PMEPA1	56937	↑	222449_at	1.71122	8.9698	0.000415619	0.0120548	222449_at	1.60751	9.17933	4.44726e-18	1.01743e-16	A_23_P57089	2.00663	11.6978	2.9126e-08	2.91076e-07	A_24_P413126	1.89228	12.2812	3.43084e-05	0.000483653
PRKACB	5567	↓	202742_s_at	-2.13016	8.69184	8.89232e-05	0.00574182	202742_s_at	-2.39472	9.68904	1.14716e-19	3.70838e-18	A_23_P371410	-2.05132	7.96933	1.19393e-09	1.6908e-08	A_24_P62708	-2.07457	9.47689	1.16258e-11	2.65411e-09
PSAT1	29968	↑	223062_s_at	3.05572	7.44332	1.43265e-06	0.000913372	223062_s_at	3.33417	8.10959	2.8147e-29	1.21882e-26	A_23_P259692	2.24435	9.82112	5.12622e-09	6.21529e-08	A_23_P259692	2.47329	10.5965	6.87502e-06	0.00012904
PYY	5697	↓	207080_s_at	-5.80692	6.16595	9.47323e-07	0.000824854	207080_s_at	-5.46811	7.39174	5.90005e-26	8.46298e-24	A_23_P4112	-3.33823	8.69332	1.85874e-46	4.4083e-42	A_23_P4112	-3.24967	8.88037	2.98387e-11	5.75337e-09
RETREG1	54463	↓	218510_x_at	-1.77867	8.09033	6.50033e-06	0.00188261	218510_x_at	-1.71779	8.9405	3.79635e-12	2.83445e-11	A_24_P266048	-2.46125	9.17229	2.11818e-10	3.57069e-09	A_23_P167599	-2.10276	12.3986	0.000591412	0.00486869
RHBDL2	54933	↓	1552502_s_at	-2.4827	6.81881	9.04556e-05	0.00574656	1552502_s_at	-1.55668	7.68088	3.23411e-06	9.41444e-06	A_23_P63432	-2.96277	9.8328	3.83092e-11	7.76212e-10	A_23_P63432	-2.20171	10.7076	1.02776e-07	4.20963e-06
RRM2	6241	↑	201890_at	2.13606	9.48225	0.000105448	0.00616796	209773_s_at	1.90411	10.5091	1.55657e-19	4.8841e-18	A_24_P234196	1.67765	9.56636	3.67288e-08	3.59166e-07	A_24_P234196	1.74037	10.4752	1.05965e-07	4.29968e-06
S100A2	6273	↑	204268_at	3.22089	7.04854	0.00111317	0.0209788	204268_at	1.90251	7.27458	3.16071e-17	5.9586e-16	A_23_P201706	2.75649	10.8408	4.36437e-12	1.10808e-10	A_23_P201706	3.02804	10.8759	1.29694e-07	5.04087e-06
SAMD13	148418	↓	229402_at	-1.55538	8.66246	0.000488734	0.0132395	229402_at	-1.81883	8.69357	3.81793e-19	1.10818e-17	A_32_P130788	-2.48982	9.80321	1.16959e-13	4.32045e-12	A_32_P130788	-2.03663	10.2822	1.30452e-09	1.20906e-07
SCARA5	286133	↓	229839_at	-2.51263	7.12117	0.000765054	0.0170248	229839_at	-2.81774	8.11343	3.93643e-23	2.86873e-21	A_23_P94103	-2.98371	8.57951	5.46404e-34	1.1341e-30	A_23_P94103	-4.66646	10.5624	8.61387e-19	3.11363e-15
SELENBP1	8991	↓	214433_s_at	-2.42166	11.4951	0.00021957	0.00876649	214433_s_at	-2.51	12.1659	5.97999e-21	2.58974e-19	A_23_P74619	-2.095	10.4278	4.03187e-07	3.02929e-06	A_23_P86021	-3.20161	16.8825	2.10893e-10	2.75533e-08
SLC17A4	10050	↓	207051_at	-2.34704	6.82259	0.000442771	0.0125136	207051_at	-3.15881	7.94371	3.36671e-28	9.81413e-26	A_23_P357270	-1.52011	8.45854	8.25405e-12	1.97059e-10	A_23_P357270	-1.79924	8.34458	5.22213e-12	1.35638e-09
SLC26A2	1836	↓	205097_at	-3.85901	10.537	0.00178451	0.0268626	205097_at	-4.64844	11.5772	3.11209e-24	2.96031e-22	A_23_P250951	-3.23197	8.65635	1.12392e-09	1.60327e-08	A_23_P250951	-3.62208	9.19164	4.57915e-08	2.17314e-06
SLC29A1	2030	↑	201801_s_at	1.669	6.58381	0.000251526	0.00938173	201801_s_at	2.00733	7.72057	2.23946e-31	1.95844e-28	A_23_P133694	1.97492	10.0814	1.33482e-14	6.11422e-13	A_23_P133694	1.62627	11.618	2.94662e-08	1.52339e-06
SLC4A4	8671	↓	203908_at	-4.36641	7.77462	0.00012999	0.00673845	203908_at	-5.37741	9.72418	2.93112e-22	1.75028e-20	A_32_P358887	-4.81135	8.50542	4.55109e-14	1.82975e-12	A_32_P358887	-4.82201	9.65339	2.92536e-12	8.36909e-10
SLC51B	123264	↓	230830_at	-3.14187	7.22175	0.000284281	0.0100275	230830_at	-3.63938	8.68458	1.44796e-24	1.52121e-22	A_23_P436284	-1.92342	10.4	0.00906669	0.0205078	A_23_P436284	-2.96007	9.57464	3.68414e-08	1.81801e-06
SLC6A6	6533	↑	228754_at	3.17563	8.44581	5.41472e-06	0.00164058	228754_at	2.36095	9.03567	6.79569e-21	2.89217e-19	A_24_P46093	2.02151	9.10037	6.38102e-12	1.57201e-10	A_24_P46093	1.82521	9.77877	7.05913e-07	1.99088e-05
SLC7A5	8140	↑	201195_s_at	3.34674	7.90034	1.59554e-06	0.000913372	201195_s_at	3.22468	8.42056	2.05216e-30	1.39085e-27	A_24_P335620	2.12274	9.39797	3.66684e-12	9.44701e-11	A_24_P335620	2.51254	10.0032	3.32845e-06	7.06899e-05
SLCO4A1	28231	↑	219911_s_at	2.82804	8.21812	8.81094e-06	0.00219649	219911_s_at	2.828	8.82414	1.40227e-28	4.63603e-26	A_23_P5903	3.6986	9.59491	4.61174e-23	1.54698e-20	A_23_P5903	2.65088	10.318	7.52821e-11	1.24161e-08
SLITRK6	84189	↓	232176_at	-3.39016	8.2728	0.000198035	0.00824545	232481_s_at	-2.53496	8.74254	2.02111e-10	1.13301e-09	A_23_P65307	-1.78149	9.8182	0.00393768	0.0100204	A_23_P65307	-1.97461	10.9598	0.00363999	0.0208209
SMIM14	201895	↓	224989_at	-1.86853	10.0817	0.000878637	0.0184931	224989_at	-1.9325	10.2638	4.37963e-21	1.95785e-19	A_23_P112634	-2.67825	10.6622	3.10991e-18	3.05553e-16	A_23_P112634	-1.816	11.6789	9.28084e-08	3.88202e-06
SMPDL3A	10924	↓	213624_at	-2.22228	9.9674	8.16702e-05	0.0055272	213624_at	-2.39804	10.6151	1.11032e-22	7.37764e-21	A_23_P72117	-3.51745	10.7183	1.82124e-16	1.23684e-14	A_23_P72117	-2.82634	11.299	5.06608e-11	9.00599e-09
SORD	6652	↑	201563_at	1.80413	9.66632	4.84817e-05	0.00422478	201563_at	1.50356	9.92521	2.81609e-24	2.69767e-22	A_32_P127153	1.85389	12.2818	2.14804e-18	2.22919e-16	A_32_P127153	1.51546	13.0698	4.88706e-07	1.47928e-05
SORD2P	653381	↑	201563_at	1.80413	9.66632	4.84817e-05	0.00422478	201563_at	1.50356	9.92521	2.81609e-24	2.69767e-22	A_32_P127153	1.85389	12.2818	2.14804e-18	2.22919e-16	A_32_P127153	1.51546	13.0698	4.88706e-07	1.47928e-05
SPIB	6689	↓	205861_at	-2.21585	6.52321	0.000162982	0.00740997	205861_at	-2.4173	7.4047	1.94107e-33	4.13886e-30	A_23_P39067	-2.83296	8.86077	1.34526e-24	5.87825e-22	A_23_P39067	-3.29743	8.95956	2.75453e-17	3.81434e-14
SPON1	10418	↓	213994_s_at	-2.60376	6.01468	0.00043671	0.0124106	213993_at	-1.98389	6.89537	8.70896e-09	3.77277e-08	A_32_P133072	-4.17095	10.0335	7.35384e-11	1.38208e-09	A_32_P133072	-2.99741	11.262	1.67468e-05	0.000267751
SRI	6717	↓	208920_at	-1.57935	8.1036	0.001634	0.0257183	208920_at	-1.90174	9.24755	8.75148e-28	2.21731e-25	A_23_P358928	-1.84738	14.5356	3.09463e-15	1.64431e-13	A_23_P59718	-1.51975	9.82935	5.25209e-07	1.55931e-05
ST6GALNAC1	55808	↓	227725_at	-3.46192	10.956	0.000404448	0.011853	227725_at	-1.56502	11.6981	5.89691e-07	1.93471e-06	A_23_P54968	-2.80234	12.3083	1.24201e-10	2.20213e-09	A_23_P54968	-2.54702	14.5179	1.25114e-06	3.1653e-05
STMN2	11075	↓	203000_at	-2.90096	6.29325	7.67693e-07	0.000755947	203000_at	-2.60985	7.91366	4.52892e-22	2.51596e-20	A_23_P146274	-4.17756	6.45486	3.23724e-28	2.2397e-25	A_23_P146274	-3.19194	9.37656	5.87841e-09	4.26003e-07
SULT1A1	6817	↓	215299_x_at	-1.74879	10.1754	0.00014371	0.00691988	215299_x_at	-1.59304	10.6427	3.17803e-19	9.38524e-18	A_23_P434212	-1.84623	10.0626	1.73906e-09	2.37371e-08	A_23_P434212	-1.78189	11.2889	1.56569e-05	0.000254065
SULT1A2	6799	↓	215299_x_at	-1.74879	10.1754	0.00014371	0.00691988	211385_x_at	-1.60735	9.91964	2.02249e-20	7.67922e-19	A_23_P106773	-2.51523	11.2498	1.12218e-10	2.00249e-09	A_23_P106773	-2.53373	12.246	1.11008e-06	2.87126e-05
TCEA3	6920	↓	226388_at	-2.14951	10.2997	2.5822e-06	0.00117215	226388_at	-1.80143	10.2203	1.56829e-19	4.91517e-18	A_23_P34375	-2.42929	11.2103	2.06983e-09	2.76942e-08	A_24_P327886	-2.12916	14.0196	5.91896e-08	2.6912e-06
TEAD4	7004	↑	41037_at	2.19903	6.1312	3.45175e-05	0.00357783	41037_at	2.06213	6.87889	1.94189e-29	9.07665e-27	A_23_P94795	2.14969	9.07664	1.00916e-17	9.13169e-16	A_23_P94795	2.11968	10.5965	4.77225e-13	1.80001e-10
TESC	54997	↑	218872_at	3.26507	7.85088	0.000567994	0.014416	218872_at	2.20124	7.53689	4.92748e-14	4.97335e-13	A_23_P76538	3.42712	12.3023	7.49866e-10	1.1137e-08	A_23_P76538	3.26308	13.5951	3.37213e-07	1.09565e-05
TGFBI	7045	↑	201506_at	1.94343	12.1485	0.000110157	0.00623398	201506_at	1.97802	11.7728	7.14492e-23	4.90377e-21	A_23_P156327	2.26779	14.2468	1.42434e-07	1.19417e-06	A_23_P156327	2.29915	15.7664	1.02775e-07	4.20963e-06
TMEM37	140738	↓	1554485_s_at	-2.44899	7.9202	4.143e-05	0.00394165	1554485_s_at	-2.77011	8.79122	1.12689e-18	2.96603e-17	A_23_P67799	-2.43127	9.91839	1.91125e-09	2.58326e-08	A_23_P67799	-2.29303	10.9318	9.46738e-09	6.26001e-07
TPX2	22974	↑	210052_s_at	2.21319	8.80437	7.3573e-05	0.0053075	210052_s_at	1.85122	9.54102	9.92395e-19	2.64801e-17	A_23_P68610	2.13736	10.2787	4.3994e-14	1.7709e-12	A_23_P68610	1.86198	11.0972	1.25925e-08	7.79193e-07
TRIB3	57761	↑	218145_at	1.91639	7.59883	2.0561e-05	0.00297517	218145_at	2.04444	8.29702	1.20468e-20	4.83118e-19	A_23_P210690	3.33996	12.3978	5.22996e-14	2.09255e-12	A_23_P210690	3.69188	13.4409	1.73107e-09	1.54183e-07
TRPM6	140803	↓	224412_s_at	-3.77124	6.71252	0.0018385	0.0273263	224412_s_at	-4.81197	8.05966	2.4048e-23	1.8313e-21	A_23_P216712	-4.41748	8.32208	7.54642e-16	4.58152e-14	A_23_P216712	-3.94983	9.07657	1.86063e-10	2.49095e-08
TSPAN7	7102	↓	202242_at	-3.30786	8.23025	0.000202857	0.00839299	202242_at	-3.13368	9.16676	1.46134e-23	1.1721e-21	A_23_P114185	-2.54915	7.76474	8.59615e-17	6.3157e-15	A_23_P114185	-2.32275	9.32352	1.52625e-07	5.77683e-06
UBE2C	11065	↑	202954_at	2.15282	9.86982	0.000391455	0.0117274	202954_at	1.95591	10.0567	2.07993e-20	7.87526e-19	A_24_P297539	2.0932	12.187	3.55779e-13	1.16981e-11	A_24_P297539	2.55553	13.1802	9.96473e-09	6.51724e-07
UGT1A8	54576	↓	221305_s_at	-2.25486	6.37989	0.000959984	0.0192244	221305_s_at	-3.93338	7.93004	1.00572e-23	8.57393e-22	A_23_P158330	-2.06583	7.51458	2.60681e-08	2.64739e-07	A_23_P158330	-2.55759	9.22229	2.97372e-09	2.38426e-07
UGT1A9	54600	↓	221305_s_at	-2.25486	6.37989	0.000959984	0.0192244	221305_s_at	-3.93338	7.93004	1.00572e-23	8.57393e-22	A_24_P222872	-1.69385	8.61478	1.93432e-05	9.51655e-05	A_24_P222872	-2.5028	9.90603	1.05998e-08	6.79142e-07
VIPR1	7433	↓	205019_s_at	-1.85044	8.79688	8.01222e-05	0.005498	205019_s_at	-1.96377	9.69782	1.24149e-27	2.97847e-25	A_24_P105933	-1.94064	8.05921	1.54503e-13	5.52898e-12	A_24_P105933	-1.62231	9.60315	5.81894e-08	2.66247e-06
ZG16	653808	↓	214142_at	-4.62112	10.4303	0.00180564	0.027042	214142_at	-5.72216	11.3544	2.32394e-22	1.4417e-20	A_23_P49145	-6.446	11.4627	5.06171e-11	9.93584e-10	A_23_P49145	-6.65251	13.2628	4.69745e-08	2.21474e-06

## Sheet: Carcinoma vs adenoma
Carcinoma vs adenoma
			GSE10714					GSE37364					GSE41657					GSE50114, GSE50115
Gene symbol	Entrez gene	up/down regulated	Probe (Affymetrix Human Genome U133 Plus 2.0 array)	logFC	Average expression	p-value	adjusted p-value	Probe (Affymetrix HG U133 plus 2)	logFC	Average expression	p-value	adjusted p-value	Probe (Agilent Whole Human Genome Microarray 4x44K G4112F)	logFC	Average expression	p-value	adjusted p-value	Probe (Agilent Whole Human Genome Microarray 4x44K G4112F)	logFC	Average expression	p-value	adjusted p-value
C11orf96	387763	↑	227099_s_at	2.03828	8.12807	0.000773238	0.0309345	227099_s_at	2.3075	8.99993	7.44263e-16	7.85096e-14	A_32_P74409	2.45903	10.1932	2.5986e-15	4.31484e-12	A_32_P74409	1.9516	13.7524	5.38163e-06	0.000208609
CLCA1	1179	↓	210107_at	-4.95609	12.3381	6.10607e-05	0.0105161	210107_at	-4.91736	11.914	1.88924e-15	1.77838e-13	A_23_P51217	-4.68228	11.57	8.74247e-10	4.93756e-08	A_23_P51217	-6.13165	14.7094	5.84039e-13	1.17246e-09
COL12A1	1303	↑	225664_at	1.94252	8.23481	0.000249482	0.0197078	231879_at	3.03046	7.01852	4.31728e-22	2.66003e-19	A_23_P214168	1.65223	8.61253	1.78452e-11	2.44885e-09	A_23_P214168	1.85437	10.0287	3.81063e-06	0.000161416
COL1A2	1278	↑	202404_s_at	2.31968	9.93414	4.18965e-06	0.00305596	202404_s_at	2.5987	10.9682	8.08895e-23	7.30972e-20	A_24_P277934	2.60525	9.18452	1.26134e-12	3.57399e-10	A_24_P277934	2.57778	12.1473	2.62137e-09	6.31692e-07
COL3A1	1281	↑	201852_x_at	1.88099	10.8459	5.22028e-06	0.00324799	201852_x_at	1.90695	12.1404	1.79648e-16	2.26343e-14	A_23_P142533	2.35261	9.51812	1.85165e-10	1.41793e-08	A_23_P142533	2.29063	12.4545	1.21253e-08	2.04649e-06
DCN	1634	↑	211896_s_at	1.96492	9.19078	0.000404419	0.0243567	211896_s_at	2.17452	10.1123	1.0083e-17	1.68735e-15	A_23_P64873	1.77319	10.3317	1.9513e-11	2.61484e-09	A_23_P64873	1.92038	13.6754	2.08489e-05	0.000567342
EPHA4	2043	↓	227449_at	-2.44961	6.09598	0.00106097	0.0358183	227449_at	-1.73978	6.86333	1.94836e-08	3.0745e-07	A_23_P108501	-1.92711	8.51927	5.14592e-13	1.87468e-10	A_23_P108501	-1.67397	9.44031	1.52037e-07	1.3081e-05
FADS1	3992	↑	208964_s_at	1.93535	6.52996	0.000564969	0.0273379	208962_s_at	1.71097	6.06011	2.23166e-17	3.41809e-15	A_23_P203419	1.58977	7.77258	5.43948e-08	1.26854e-06	A_23_P203419	2.07633	9.84548	9.90239e-08	9.54503e-06
FN1	2335	↑	211719_x_at	2.72407	9.66301	0.000763756	0.0307601	211719_x_at	3.05249	10.6244	1.40555e-15	1.37561e-13	A_24_P119745	2.86896	8.23223	4.79707e-07	7.32942e-06	A_24_P119745	2.93905	10.1787	2.33188e-06	0.000110786
G0S2	50486	↑	213524_s_at	2.83537	7.59185	2.53047e-05	0.00655724	213524_s_at	3.33145	8.55568	3.63198e-20	1.14492e-17	A_23_P74609	1.56347	8.5796	1.41247e-06	1.72642e-05	A_23_P74609	2.26625	10.7615	4.74972e-06	0.000191294
HEPACAM2	253012	↓	242601_at	-3.60278	9.06295	0.000543592	0.0267638	242601_at	-3.56283	9.42001	1.28109e-13	7.64986e-12	A_32_P118397	-2.17404	10.1852	6.035e-10	3.65723e-08	A_32_P118397	-3.16842	11.852	1.15101e-08	1.97337e-06
HMGCS2	3158	↓	240110_at	-2.58493	7.01407	5.24207e-05	0.00940259	204607_at	-2.8304	11.8301	5.24828e-12	2.10164e-10	A_23_P103588	-2.08487	11.4031	3.61556e-07	5.80324e-06	A_23_P103588	-2.88363	12.9459	1.75342e-05	0.000503685
INHBA	3624	↑	227140_at	2.48947	6.50188	3.65017e-05	0.00781374	227140_at	3.39879	6.25277	6.41082e-24	1.53563e-20	A_23_P122924	2.26901	7.87399	5.94508e-14	3.70322e-11	A_23_P122924	2.58798	10.0184	3.96032e-08	4.91761e-06
KIAA1324	57535	↓	226248_s_at	-3.88264	10.0563	2.82415e-07	0.000526593	221874_at	-1.7925	8.47523	7.63089e-12	2.93854e-10	A_23_P358714	-1.68555	9.85038	6.40396e-10	3.83879e-08	A_23_P358714	-3.08811	11.3573	1.0827e-10	5.59086e-08
L1TD1	54596	↓	219955_at	-4.9436	8.34269	2.45645e-07	0.000526593	219955_at	-1.7298	8.55892	0.00215341	0.00653521	A_23_P137484	-2.65819	9.64713	3.10872e-05	0.000213654	A_23_P137484	-3.71845	11.7876	0.000151544	0.00249653
NXPE1	120400	↓	1561387_a_at	-1.75164	7.31274	0.00245058	0.0499603	1553828_at	-1.91239	9.87426	6.78125e-10	1.57667e-08	A_23_P24543	-2.73935	10.1357	1.34964e-11	2.01893e-09	A_23_P24543	-2.57301	11.3712	1.8046e-10	8.15378e-08
PCSK1	5122	↓	205825_at	-5.37425	7.73648	0.000631421	0.0287187	205825_at	-2.12968	7.31282	0.000369511	0.00147315	A_24_P174793	-2.21032	8.62729	7.42395e-05	0.000435817	A_24_P174793	-3.4863	10.5549	0.000277476	0.00385022
PLAU	5328	↑	211668_s_at	2.16374	6.29295	0.000104233	0.0136511	211668_s_at	2.63246	7.68935	6.33935e-21	2.68531e-18	A_23_P24104	1.92589	9.63841	1.50995e-11	2.15611e-09	A_23_P24104	1.96899	11.8444	0.000288618	0.00395544
SLITRK6	84189	↓	232481_s_at	-5.54771	8.59591	3.08181e-07	0.000526593	235976_at	-3.19207	6.92305	1.33947e-11	4.85467e-10	A_23_P65307	-3.00058	9.8182	2.43055e-09	1.0849e-07	A_23_P65307	-2.29924	10.9598	0.000111662	0.002016
SPARC	6678	↑	200665_s_at	1.8778	10.2815	3.27315e-05	0.00758371	212667_at	2.2382	9.27365	2.1701e-20	7.44702e-18	A_23_P7642	2.21758	10.1867	4.27604e-14	3.08702e-11	A_23_P7642	2.37875	13.0601	6.04257e-09	1.19324e-06
SPON2	10417	↑	218638_s_at	1.70116	7.63555	0.00182721	0.0441533	218638_s_at	2.1279	8.6389	2.0093e-23	3.57117e-20	A_23_P121533	2.38889	10.8605	1.27707e-12	3.57399e-10	A_23_P121533	2.51223	13.8932	2.73826e-08	3.86216e-06
SPP1	6696	↑	209875_s_at	4.62112	7.08613	1.79228e-07	0.000504245	209875_s_at	3.73483	7.72924	1.86175e-13	1.06481e-11	A_23_P7313	1.78978	7.07907	1.68912e-11	2.34702e-09	A_23_P7313	3.57204	9.70326	3.60918e-08	4.67318e-06
ST6GALNAC1	55808	↓	227725_at	-3.47716	10.956	0.000156062	0.0161255	227725_at	-1.67135	11.6981	6.74466e-07	6.71001e-06	A_23_P54968	-1.67592	12.3083	5.61107e-08	1.29852e-06	A_23_P54968	-2.81363	14.5179	3.36406e-09	7.67998e-07
SULF1	23213	↑	212354_at	2.24941	7.93035	0.000126477	0.0151801	212353_at	2.47625	8.25104	6.67529e-17	9.13976e-15	A_23_P43164	2.07386	8.09278	3.01513e-12	6.80595e-10	A_23_P43164	3.13391	11.077	1.10023e-11	1.19309e-08
TCEA3	6920	↓	226388_at	-2.21142	10.2997	6.34361e-07	0.000895315	226388_at	-1.56538	10.2203	4.31659e-15	3.70069e-13	A_24_P327886	-1.52697	12.098	2.2357e-09	1.01125e-07	A_23_P34375	-1.58693	12.8394	1.47646e-07	1.28859e-05
TCN1	6947	↓	205513_at	-4.24058	8.71674	0.000854813	0.0324614	205513_at	-1.92533	7.74314	0.000124143	0.000587967	A_23_P64372	-1.83944	8.33708	2.32289e-05	0.000168835	A_23_P64372	-2.5779	10.2451	0.000611113	0.0067656
